# Supplementary material for: Biotic Response of Plankton Communities to Middle to Late Miocene Monsoon Wind and Nutrient Flux Changes in the Oman Margin Upwelling Zone
Source: Copernicus journal article supplement (doi:10.5194/cp-2023-14), 2023-03-30
Supplement: Supplementary file 1 [file SupplementaryData1(nannfossils).xlsx]

## Sheet: RawData
Site	Hole	Core	Type	Section	Top Offset (cm) – Sampled	Bottom Offset (cm) – Sampled	depth CSF-A (m)	Age (ka)	Age (Ma)	Taphogroup	Interval	Total Counts	Coccoliths (g/sed)	Siliceous Fragments	Braarudosphaera bigelowii	Calcidiscus leptoporus subsp leptoporus	Calcidiscus leptoporus subsp small	Calcidiscus macintyrei	Calcidiscus tropicus	Catinaster calyculus	Catinaster coalitus	Catinaster virginianus	Coccolithus miopelagicus	Coccolithus pelagicus	Coronocyclus baileyi	Coronocyclus nitescens	Cyclicargolithus floridanus	Diatom spp1 (colonial)	Diatom spp2 (Pennales)	Diatom spp3 (Centrales)	Discoaster bellus	Discoaster bollii	Discoaster braarudii	Discoaster brouweri	Discoaster calcaris	Discoaster challengeri	Discoaster deflandrei	Discoaster exilis	Discoaster hamatus	Discoaster kugleri	Discoaster pentaradiatus	Discoaster prepentaradiatus	Discoaster sp.	Discoaster surculus	Discoaster variabilis	Helicosphaera ampliaperta	Helicosphaera intermedia	Helicosphaera carteri	Oolitothus antillarium
722	B	30	X	1	101	103	276.62	8745.56	8.74556	1b	4	4.11212e+10	4.10872e+10	3.40126e+07	0	1.02038e+08	1.87069e+08	1.70063e+07	3.40126e+07	0	0	0	0	8.16302e+08	0	0	0	0	1.70063e+07	1.70063e+07	0	0	1.70063e+07	0	0	0	0	0	0	0	0	0	0	1.70063e+07	1.70063e+07	0	1.70063e+07	1.87069e+08	0
722	B	30	X	2	6	8	277.17	8784.96	8.78496	1b		2.84111e+10	2.73869e+10	1.02428e+09	0	5.87701e+07	2.51872e+07	2.51872e+07	8.39572e+06	0	0	0	0	5.87701e+08	0	0	0	0	5.45722e+08	2.43476e+08	0	0	8.39572e+06	8.39572e+06	0	0	0	0	0	0	2.51872e+07	0	0	0	0	0	8.39572e+06	1.00749e+08	0
722	B	30	X	CC	5	7	277.38	8800	8.8	1b		3.52554e+10	3.50685e+10	1.86896e+08	0	1.10439e+08	1.95391e+08	8.49528e+06	5.09717e+07	0	0	0	0	2.71849e+08	0	0	0	0	1.35924e+08	1.69906e+07	0	0	0	8.49528e+06	0	0	0	0	0	0	2.54858e+07	0	2.54858e+07	0	1.69906e+07	0	0	1.4442e+08	0
722	B	31	X	1	141	143	286.72	9131.07	9.13107	4a	3b	5.33473e+09	4.04172e+09	1.29301e+09	0	1.19882e+08	3.42519e+07	0	0	0	0	0	0	7.62104e+08	0	0	0	0	7.53541e+08	1.62696e+08	8.56297e+06	0	8.56297e+06	4.28148e+07	0	0	0	0	0	0	0	4.28148e+07	1.4557e+08	0	0	0	0	8.56297e+07	0
722	B	31	X	2	52	54	287.33	9152.69	9.15269	4b		3.18764e+09	2.81162e+09	3.76022e+08	0	5.12757e+07	8.54595e+06	0	0	0	0	0	0	2.56378e+08	0	0	0	0	1.53827e+08	5.98216e+07	0	0	8.54595e+06	8.54595e+06	0	0	0	0	0	0	0	2.56378e+07	8.54595e+07	0	2.56378e+07	0	0	0	0
722	B	31	X	3	141	143	289.72	9237.41	9.23741	4b		6.06258e+09	4.15304e+09	1.90954e+09	0	2.56889e+07	1.71259e+07	0	0	0	0	0	0	1.54133e+08	0	0	0	0	1.09606e+09	2.22637e+08	0	8.56297e+06	8.56297e+06	3.42519e+07	0	0	0	0	0	0	0	3.42519e+07	7.70667e+07	0	0	0	0	1.71259e+07	0
722	B	31	X	4	52	54	290.33	9259.03	9.25903	4b		7.87644e+09	7.58987e+09	2.86574e+08	0	1.30261e+08	7.81566e+07	0	0	0	0	0	0	3.99467e+08	0	0	0	0	1.64997e+08	4.34203e+07	8.68406e+06	0	8.68406e+06	3.47362e+07	0	0	0	0	0	0	0	1.73681e+07	9.55247e+07	0	0	0	0	1.21577e+08	4.34203e+07
722	B	31	X	5	102	104	292.33	9329.92	9.32992	4b		5.16162e+09	2.09588e+09	3.06574e+09	0	1.64383e+07	0	0	0	0	0	0	0	1.15068e+08	0	0	0	0	1.79999e+09	6.32874e+08	0	0	1.64383e+07	0	0	0	0	0	0	0	0	0	3.28766e+07	0	8.21914e+06	0	0	8.21914e+06	0
722	B	31	X	6	56	58	293.37	9366.78	9.36678	4b		8.33387e+09	8.2744e+09	5.94669e+07	0	7.64575e+07	4.24764e+07	0	0	0	0	0	0	5.94669e+08	0	0	0	0	1.69906e+07	1.69906e+07	8.49528e+06	0	0	8.49528e+07	0	1.69906e+07	0	0	0	0	0	1.69906e+07	1.01943e+08	8.49528e+06	2.54858e+07	0	0	1.10439e+08	0
722	B	32	X	1	90	92	295.91	9456.82	9.45682	4b		2.96965e+09	1.96063e+09	1.00903e+09	0	3.28138e+07	8.20346e+06	0	0	0	0	0	0	8.20346e+07	0	0	0	0	4.84004e+08	1.80476e+08	0	0	8.20346e+07	6.56276e+07	0	0	0	0	0	0	0	0	1.31255e+08	0	0	0	0	0	0
722	B	32	X	2	50	52	297.01	9495.81	9.49581	4b		6.97559e+09	6.58091e+09	3.94683e+08	0	5.14804e+07	9.43807e+07	0	0	0	0	0	0	6.86405e+08	0	0	0	0	2.48822e+08	5.14804e+07	8.58006e+06	0	3.43202e+07	9.43807e+07	0	8.58006e+06	0	0	0	0	0	0	2.05921e+08	0	0	0	0	6.00604e+07	0
722	B	32	X	3	116	118	299.17	9572.37	9.57237	4b		6.15883e+09	4.77623e+09	1.38259e+09	0	2.51381e+07	8.37936e+06	0	1.67587e+07	0	0	0	0	1.50828e+08	0	0	0	0	9.1335e+08	2.01105e+08	8.37936e+06	0	2.51381e+07	1.2569e+08	0	1.67587e+07	0	0	0	0	0	0	2.93278e+08	0	0	0	0	0	0
722	B	32	X	4	24	26	299.75	9592.93	9.59293	4b		4.7927e+09	4.46331e+09	3.29395e+08	0	2.47047e+07	1.64698e+07	0	0	0	0	0	0	2.96456e+08	0	0	0	0	1.81168e+08	1.64698e+07	8.23489e+06	0	8.23489e+07	1.81168e+08	0	8.23489e+06	0	0	0	0	0	0	2.55281e+08	0	4.94093e+07	0	0	0	0
722	B	32	X	5	7	9	301.08	9640.08	9.64008	3	3a	4.94746e+09	8.84054e+08	4.0634e+09	0	1.62212e+07	0	0	0	0	0	0	0	0	0	0	0	0	2.05198e+09	5.5152e+08	8.11059e+06	0	0	7.29953e+07	0	0	0	0	0	0	8.11059e+06	0	1.54101e+08	0	0	0	0	0	0
722	B	32	X	CC	0	2	301.36	9650	9.65	4b		6.74158e+09	4.34117e+09	2.40041e+09	0	5.10726e+07	1.70242e+07	0	8.5121e+06	0	0	0	0	7.66089e+07	0	0	0	0	1.07252e+09	2.97924e+08	0	0	0	1.27682e+08	0	8.5121e+06	0	0	8.5121e+06	0	0	0	5.53287e+08	0	8.5121e+06	0	0	8.5121e+06	0
722	B	33	X	1	105	107	305.76	9812.53	9.81253	3		5.58567e+09	1.32071e+09	4.26496e+09	0	5.04729e+07	0	0	8.41215e+06	0	0	0	0	2.52365e+07	0	0	0	0	2.43952e+09	7.8233e+08	2.52365e+07	0	0	8.41215e+07	0	8.41215e+06	0	0	0	0	0	0	1.34594e+08	0	0	0	0	0	0
722	B	33	X	2	90	92	307.11	9862.4	9.8624	4b		8.157e+09	7.65636e+09	5.00641e+08	0	5.26537e+08	1.03581e+08	0	1.64003e+08	8.63175e+06	0	0	0	3.53902e+08	0	0	0	0	3.79797e+08	1.72635e+07	2.41689e+08	3.4527e+07	0	8.63175e+07	0	8.63175e+06	0	0	5.17905e+07	0	0	0	1.72635e+08	0	0	0	0	1.72635e+07	8.63175e+06
722	B	33	X	3	90	92	308.61	9917.81	9.91781	3		1.19931e+10	8.51125e+08	1.1142e+10	0	8.59722e+06	0	0	0	0	0	0	0	8.59722e+06	0	0	0	0	6.98954e+09	1.98596e+09	8.59722e+06	2.57917e+07	0	0	0	0	0	0	0	0	0	0	4.29861e+07	0	0	0	0	0	0
722	B	33	X	CC	30	32	309.51	9951.06	9.95106	4b		6.77894e+09	6.05162e+09	7.27314e+08	0	3.26359e+08	1.0257e+08	0	1.86491e+07	9.32454e+06	0	9.32454e+06	0	2.23789e+08	0	0	0	0	4.66227e+08	4.66227e+07	1.11894e+08	1.86491e+07	0	2.79736e+07	0	4.66227e+07	0	0	2.79736e+07	0	0	0	9.32454e+07	0	0	0	0	3.72981e+07	0
722	B	34	X	1	130	132	315.61	10176.4	10.1764	3		1.00729e+10	2.47583e+09	7.59707e+09	0	3.39155e+07	8.47888e+06	0	4.23944e+07	0	0	0	0	1.69578e+07	0	0	0	8.47888e+06	5.22299e+09	7.63099e+08	1.5262e+08	0	0	0	0	0	0	0	0	0	0	0	2.54366e+07	0	0	0	0	0	0
722	B	34	X	2	51	53	316.32	10202.6	10.2026	4b		1.4746e+10	1.05261e+10	4.21988e+09	0	2.67679e+08	2.36187e+07	1.57458e+07	3.14917e+07	0	1.57458e+07	0	0	1.25967e+08	0	0	0	0	2.92085e+09	2.67679e+08	2.4406e+08	0	3.14917e+07	0	0	1.57458e+07	0	7.87291e+06	3.14917e+07	0	0	0	5.51104e+07	0	0	0	0	6.29833e+07	0
722	B	34	X	3	30	32	317.61	10250.3	10.2503	3		1.09327e+10	1.60775e+09	9.32494e+09	0	3.38473e+07	8.46183e+06	0	0	0	0	0	0	5.0771e+07	0	0	0	0	5.76251e+09	1.14235e+09	1.69237e+07	0	0	0	0	0	0	0	0	0	0	0	8.46183e+06	0	0	0	0	0	0
722	B	34	X	4	15	17	318.96	10300.1	10.3001	4b		9.59713e+09	5.31996e+09	4.27718e+09	0	1.94417e+08	8.83714e+06	0	8.83714e+06	0	0	0	0	5.30228e+07	0	0	0	1.76743e+07	3.46416e+09	2.56277e+08	1.14883e+08	0	0	0	0	0	0	0	0	0	0	0	0	0	0	0	0	4.41857e+07	8.83714e+06
722	B	34	X	CC	35	37	319.82	10331.9	10.3319	4b		8.76546e+09	6.75496e+09	2.0105e+09	0	2.60777e+08	8.41215e+06	0	1.68243e+07	0	0	0	0	5.04729e+07	0	0	0	0	1.7329e+09	1.59831e+08	0	4.20608e+07	0	8.41215e+06	0	4.20608e+07	0	0	8.41215e+06	0	2.18716e+08	0	4.20608e+07	0	0	0	0	5.04729e+07	4.20608e+07
722	B	35	X	1	9	11	324.1	10490	10.49	4b		7.65257e+09	6.86391e+09	7.88656e+08	0	2.59997e+08	2.59997e+07	0	0	0	2.59997e+07	0	0	5.80659e+08	0	0	0	0	6.49992e+08	4.33328e+07	1.73331e+08	0	0	8.66655e+06	0	1.73331e+07	0	0	8.66655e+06	0	0	0	2.59997e+07	0	0	0	0	6.06659e+07	8.66655e+06
722	B	35	X	2	13	15	325.64	10539	10.539	4b		1.00749e+10	2.27524e+09	7.79963e+09	0	7.55615e+07	8.39572e+06	0	8.39572e+06	0	3.35829e+07	0	0	2.09893e+08	0	0	0	5.54118e+08	6.17925e+09	6.54866e+08	8.39572e+06	0	0	0	0	0	0	0	0	0	0	0	8.39572e+06	0	0	0	0	1.67914e+07	0
722	B	35	X	3	10	12	327.11	10585.8	10.5858	4b		6.43945e+09	5.81328e+09	6.26176e+08	0	6.76947e+07	8.46183e+06	0	8.46183e+06	0	0	8.46183e+06	0	2.03084e+08	0	0	0	0	5.50019e+08	6.76947e+07	0	0	0	0	0	0	0	8.46183e+06	0	0	0	0	8.46183e+06	0	0	0	0	1.69237e+07	2.53855e+07
722	B	35	X	4	140	142	329.91	10674.8	10.6748	3		4.61481e+09	1.13234e+09	3.48247e+09	0	4.27297e+06	0	0	8.54595e+06	0	0	0	0	0	0	0	0	0	2.77316e+09	3.71749e+08	4.27297e+06	0	0	0	0	0	0	0	0	0	0	0	0	0	0	0	0	0	0
722	B	35	X	5	82	84	330.83	10704.1	10.7041	4b		6.53389e+09	5.77242e+09	7.61468e+08	0	1.1463e+08	4.9127e+07	3.27513e+07	9.00661e+07	0	4.09391e+07	0	0	1.8832e+08	0	0	0	8.18783e+06	5.24021e+08	1.1463e+08	3.27513e+07	0	0	7.36905e+07	0	0	0	1.63757e+07	0	0	0	0	5.73148e+07	0	0	0	0	3.27513e+07	3.27513e+07
722	B	35	X	6	71	73	332.22	10748.3	10.7483	4c		4.65054e+09	2.93278e+09	1.71777e+09	0	4.18968e+07	8.37936e+06	0	4.18968e+07	0	8.37936e+06	0	0	1.50828e+08	0	0	0	2.51381e+07	1.38259e+09	1.42449e+08	0	0	0	2.51381e+07	1.67587e+07	0	0	1.67587e+07	0	0	0	0	1.67587e+07	0	0	0	0	0	0
722	B	35	X	7	19	21	333.2	10779.5	10.7795	4b		4.62996e+09	3.34148e+09	1.28849e+09	0	1.28849e+08	0	0	1.71798e+07	0	8.58991e+06	0	8.58991e+06	7.73092e+07	0	0	0	0	7.81682e+08	4.29496e+07	0	0	0	0	0	0	0	6.87193e+07	0	0	0	0	1.71798e+08	0	0	0	0	1.71798e+07	0
722	B	35	X	CC	5	7	333.53	10790	10.79	4c		3.49806e+09	7.962e+08	2.70186e+09	0	2.61049e+07	0	0	0	0	8.70164e+06	0	0	1.30525e+07	0	0	0	3.48066e+07	1.93176e+09	1.5663e+08	0	0	0	0	0	0	0	2.61049e+07	0	0	0	0	1.30525e+07	0	0	0	0	4.35082e+06	0
722	B	36	X	1	65	67	334.36	10821	10.821	4c		6.51561e+09	6.1856e+09	3.30011e+08	0	2.36931e+08	5.0771e+07	1.69237e+07	7.61565e+07	0	0	0	0	2.7924e+08	0	0	0	0	2.70779e+08	2.53855e+07	0	0	0	0	0	0	0	9.30802e+07	0	0	0	0	6.76947e+07	0	0	0	0	5.0771e+07	0
722	B	36	X	2	39	41	335.6	10867.3	10.8673	4b		3.85946e+09	3.72434e+09	1.35123e+08	0	7.60069e+07	0	0	3.37808e+07	0	0	0	0	9.28973e+07	0	0	0	0	7.60069e+07	8.44521e+06	0	0	0	0	0	0	0	1.68904e+07	0	0	0	0	4.2226e+07	0	0	0	0	8.44521e+06	0
722	B	36	X	3	102	104	337.73	10946.9	10.9469	4b		5.24431e+09	5.05517e+09	1.89139e+08	0	1.11764e+08	0	0	4.29861e+07	0	0	0	0	3.43889e+08	0	0	0	0	1.71944e+08	8.59722e+06	0	0	0	0	0	0	0	1.71944e+07	0	0	0	0	1.71944e+07	0	0	0	0	1.71944e+07	0
722	B	36	X	4	29	31	338.5	10975.7	10.9757	4c	2b	2.66164e+09	1.90355e+09	7.58088e+08	0	3.74879e+07	4.16532e+06	0	2.08266e+07	0	0	0	0	1.74943e+08	0	0	0	4.16532e+06	5.91476e+08	8.33064e+07	0	0	0	0	0	0	0	5.41492e+07	0	0	0	0	4.99838e+07	0	0	0	0	1.2496e+07	0
722	B	36	X	CC	32	34	339.42	11010.1	11.0101	4c		1.10075e+09	5.71352e+08	5.29399e+08	0	0	0	3.99547e+06	3.99547e+06	0	0	0	0	2.79683e+07	0	0	0	3.19637e+07	4.01544e+08	2.79683e+07	0	0	0	0	0	0	0	3.99547e+06	0	0	0	0	7.99093e+06	0	0	0	0	1.99773e+06	0
722	B	37	X	1	101	103	344.42	11196.9	11.1969	4c		1.30228e+10	1.28451e+10	1.77698e+08	0	8.46183e+07	2.53855e+07	0	1.69237e+07	0	0	8.46183e+06	8.46183e+06	7.61565e+08	0	0	0	0	1.35389e+08	8.46183e+06	0	0	0	0	0	0	0	3.38473e+07	0	0	0	0	5.0771e+07	0	0	0	0	1.8616e+08	2.53855e+07
722	B	37	X	2	60	62	345.51	11237.6	11.2376	4c		5.44491e+09	5.41885e+09	2.60522e+07	0	1.30261e+08	0	0	2.60522e+07	0	0	0	1.73681e+07	1.64997e+08	0	0	0	0	8.68406e+06	0	0	0	0	0	0	0	0	2.60522e+07	0	0	0	0	8.68406e+06	0	0	0	0	8.68406e+06	8.68406e+06
722	B	37	X	3	10	12	346.51	11275	11.275	4c		9.67599e+09	9.65129e+09	2.47047e+07	0	1.56463e+08	2.47047e+07	2.47047e+07	9.05838e+07	0	0	0	8.23489e+06	5.02328e+08	0	0	0	0	1.64698e+07	0	0	0	0	0	0	0	8.23489e+06	2.47047e+07	0	8.23489e+06	0	0	4.11744e+07	0	0	0	0	8.23489e+06	0
722	B	37	X	4	90	92	348.81	11360.9	11.3609	4c		6.80543e+09	5.99787e+09	8.07567e+08	0	3.36486e+07	8.41215e+06	0	1.68243e+07	0	0	0	0	1.00946e+08	0	0	0	0	4.96317e+08	1.09358e+08	0	0	0	0	0	8.41215e+06	0	2.52365e+07	0	0	0	0	0	0	0	0	0	0	0
722	B	37	X	5	82	84	350.23	11413.9	11.4139	4c		8.75353e+09	8.66669e+09	8.68406e+07	0	1.91049e+08	9.55247e+07	1.73681e+07	1.04209e+08	0	0	0	0	1.99733e+08	0	0	0	0	6.07884e+07	0	0	0	0	0	0	8.68406e+06	1.73681e+07	0	0	8.68406e+06	0	0	2.60522e+07	0	0	0	0	6.07884e+07	0
722	B	37	X	6	22	24	351.13	11447.6	11.4476	4c		4.18817e+09	3.99278e+09	1.95391e+08	0	5.94669e+07	0	0	3.39811e+07	0	0	0	1.69906e+07	1.18934e+08	0	0	0	0	6.79622e+07	8.49528e+06	0	0	0	0	0	8.49528e+06	0	1.69906e+07	0	0	0	0	1.69906e+07	0	0	0	0	0	0
722	B	37	X	7	20	22	352.61	11502.9	11.5029	4c		7.57414e+09	7.51638e+09	5.77548e+07	0	1.65014e+08	3.30028e+07	6.60055e+07	6.60055e+07	0	0	2.47521e+07	0	2.55771e+08	0	0	0	0	4.12535e+07	8.25069e+06	0	0	0	0	0	0	8.25069e+06	0	0	0	0	0	2.47521e+07	0	0	0	0	2.47521e+07	0
722	B	38	X	1	102	104	354.13	11559.6	11.5596	4c		5.77875e+09	5.69898e+09	7.9768e+07	0	1.24084e+08	5.31787e+07	0	1.50673e+08	0	0	0	1.77262e+07	2.48167e+08	0	0	0	0	8.86311e+06	0	0	0	0	0	0	1.77262e+07	8.86311e+06	1.77262e+07	0	0	0	0	5.31787e+07	0	0	0	0	6.20418e+07	0
722	B	38	X	2	60	62	355.21	11600	11.6	4c		3.86875e+09	3.76955e+09	9.91987e+07	0	1.15732e+08	8.26656e+06	0	4.13328e+07	0	0	0	1.65331e+07	2.81063e+08	0	0	0	8.26656e+06	4.13328e+07	0	0	0	0	0	0	4.13328e+07	8.26656e+06	8.26656e+06	0	4.95994e+07	0	0	1.32265e+08	0	0	0	0	4.13328e+07	0
722	B	38	X	3	10	12	356.21	11636.2	11.6362	4c		3.71283e+09	3.54915e+09	1.63675e+08	0	1.03373e+08	0	2.58434e+07	5.16867e+07	0	0	0	0	3.8765e+08	0	0	0	0	3.44578e+07	0	0	0	1.72289e+07	0	0	8.61445e+06	1.72289e+07	0	0	0	0	0	8.61445e+07	0	0	0	0	8.61445e+06	0
722	B	38	X	4	90	92	358.51	11723.9	11.7239	4c		3.11336e+09	3.06328e+09	5.00809e+07	0	6.67745e+07	2.50405e+07	8.34682e+06	1.66936e+07	0	0	0	0	4.84115e+08	0	0	0	0	1.66936e+07	0	0	0	0	0	0	0	3.33873e+07	0	0	4.17341e+07	0	0	5.00809e+07	0	0	0	0	0	0
722	B	38	X	5	82	84	359.93	11800	11.8	4c		3.28378e+09	3.26727e+09	1.65014e+07	0	5.77548e+07	8.25069e+06	3.30028e+07	8.25069e+06	0	0	0	0	6.93058e+08	0	0	8.25069e+06	0	0	0	0	0	0	0	0	0	1.65014e+07	0	0	3.30028e+07	0	0	5.77548e+07	0	0	0	0	0	0
722	B	38	X	6	22	24	360.83	11880	11.88	4c		7.84386e+09	7.84386e+09	0	0	1.94989e+08	7.09049e+07	5.31787e+07	1.77262e+07	0	0	0	2.65893e+07	3.45661e+08	0	0	0	0	0	0	0	0	8.86311e+06	0	0	6.20418e+07	2.65893e+07	8.86311e+06	0	8.86311e+06	0	0	5.31787e+07	0	0	0	0	5.31787e+07	0
722	B	38	X	7	20	22	362.31	12011.6	12.0116	1a		1.13059e+10	1.12218e+10	8.41215e+07	0	4.20608e+07	4.20608e+07	8.41215e+06	2.52365e+07	0	0	0	3.36486e+07	2.18716e+08	0	0	0	0	0	0	0	0	0	0	0	8.41215e+06	1.68243e+07	0	0	2.52365e+07	0	0	0	0	0	0	0	5.04729e+07	0
722	B	39	X	1	13	15	362.94	12067.6	12.0676	4c	2a	5.52554e+09	5.52554e+09	0	0	7.83148e+07	3.48066e+07	0	1.74033e+07	0	0	0	3.48066e+07	3.30662e+08	0	0	0	0	0	0	0	0	1.74033e+07	0	0	1.0442e+08	2.61049e+07	8.70164e+06	0	1.74033e+07	0	0	4.35082e+07	0	0	0	0	2.61049e+07	0
722	B	39	X	2	80	82	365.11	12260.4	12.2604	4c		2.51788e+09	2.50959e+09	8.28249e+06	0	2.48475e+07	0	0	2.48475e+07	0	0	8.28249e+06	2.48475e+07	9.93898e+07	0	0	0	0	8.28249e+06	0	0	0	0	0	0	4.96949e+07	8.28249e+06	0	0	0	0	0	3.31299e+07	0	0	0	0	0	0
722	B	39	X	CC	20	22	365.58	12302.2	12.3022	4c		2.84626e+09	2.84626e+09	0	0	0	8.34682e+06	0	1.66936e+07	0	0	0	1.66936e+07	1.8363e+08	0	0	8.34682e+06	0	0	0	0	0	3.33873e+07	0	0	2.50405e+07	8.34682e+06	3.33873e+07	0	2.50405e+07	0	0	5.00809e+07	0	0	0	0	0	0
722	B	40	X	1	10	12	372.61	12927.1	12.9271	4c		4.01059e+09	4.01059e+09	0	8.26927e+06	4.96156e+07	4.96156e+07	0	4.13463e+07	0	0	0	8.26927e+06	1.1577e+08	0	0	0	0	0	0	0	0	1.65385e+07	0	0	4.13463e+07	0	2.48078e+07	0	0	0	0	1.73655e+08	0	8.26927e+06	0	0	0	8.26927e+06
722	B	40	X	2	5	7	374.06	13056	13.056	4c		4.81444e+09	4.81444e+09	0	0	1.11764e+08	1.20361e+08	0	3.43889e+07	0	0	8.59722e+06	0	3.78278e+08	0	0	8.59722e+06	0	0	0	0	0	0	0	0	0	8.59722e+06	2.32125e+08	0	0	0	0	1.5475e+08	0	0	0	0	6.01806e+07	0
722	B	40	X	3	17	19	375.68	13200	13.2	4c		2.28415e+09	2.28415e+09	0	0	1.48608e+08	7.15518e+07	0	1.65119e+07	0	0	0	0	1.54112e+08	0	5.50398e+06	1.48608e+08	0	0	0	0	0	0	0	0	0	0	9.90717e+07	0	0	0	0	6.05438e+07	0	0	0	0	1.1008e+07	0
722	B	40	X	CC	24	26	376.01	13213.2	13.2132	4c		2.03487e+09	2.03487e+09	0	0	9.24943e+07	3.2645e+07	0	2.17634e+07	0	0	5.44084e+06	0	2.06752e+08	0	0	1.74107e+08	0	0	0	0	0	0	0	0	0	0	8.16126e+07	0	0	0	0	5.98492e+07	0	0	0	0	1.63225e+07	5.44084e+06
722	B	41	X	1	32	34	382.53	13474	13.474	1a	1	9.42895e+09	9.42895e+09	0	0	2.47047e+07	3.29395e+07	0	1.64698e+07	0	0	0	0	8.23489e+07	0	0	4.77623e+08	0	0	0	0	0	0	0	0	0	2.47047e+07	0	0	0	0	0	0	0	0	0	0	3.29395e+07	0
722	B	41	X	2	22	24	383.93	13530	13.53	1a		3.86079e+09	3.86079e+09	0	0	1.59208e+07	2.38812e+07	0	7.96039e+06	0	0	7.96039e+06	0	8.75643e+07	0	0	8.03999e+08	0	0	0	0	0	0	0	0	0	7.96039e+06	0	0	0	0	0	0	0	0	0	0	1.59208e+07	7.96039e+06
722	B	41	X	CC	12	14	384.25	13541	13.541	1a		4.12528e+09	4.12528e+09	0	0	0	3.46662e+07	0	0	0	0	0	0	3.03329e+08	0	0	4.24661e+08	0	0	0	0	0	0	0	0	0	0	1.73331e+07	0	0	0	0	4.33328e+07	0	0	0	0	8.66655e+06	0
722	B	42	X	1	105	107	392.86	13888.2	13.8882	2		3.45143e+09	3.45143e+09	0	0	3.36725e+07	3.36725e+07	0	8.41811e+06	0	0	0	0	3.36725e+07	0	0	1.75939e+09	0	0	0	0	0	0	0	0	0	0	1.68362e+07	0	0	0	0	0	0	0	0	0	8.41811e+06	0
722	B	42	X	2	105	107	394.36	14013	14.013	4a		4.20237e+09	4.20237e+09	0	0	2.08515e+08	7.21782e+07	0	4.0099e+07	0	0	0	0	8.0198e+06	0	0	1.00247e+09	0	0	0	0	0	0	0	0	0	1.28317e+08	3.20792e+07	0	0	0	0	3.20792e+07	0	0	0	0	8.0198e+06	2.40594e+07
722	B	42	X	3	0	2	394.81	14050.4	14.0504	4a		3.86015e+09	3.86015e+09	0	0	9.45694e+07	3.43889e+07	0	1.37556e+08	0	0	0	0	4.29861e+07	0	0	5.15833e+07	0	0	0	0	0	0	0	0	0	3.52486e+08	5.15833e+07	0	0	0	0	6.87778e+07	0	0	0	0	0	0
722	B	42	X	3	13	15	394.94	14061.3	14.0613	4a		2.76672e+08	2.74607e+08	2.06472e+06	0	4.12944e+06	0	0	0	0	0	0	0	1.23883e+07	0	0	2.47766e+07	2.06472e+06	0	0	0	0	0	0	0	0	8.25887e+06	1.4453e+07	0	0	0	0	0	0	0	0	0	0	0
722	B	42	X	4	7	9	396.38	14181.1	14.1811	4b		1.76981e+09	1.76981e+09	0	0	8.36791e+06	0	0	0	0	0	2.09198e+07	4.18395e+06	4.60235e+07	0	0	8.7863e+07	0	0	0	0	0	0	0	0	0	6.69432e+07	2.92877e+07	0	0	0	0	4.18395e+06	0	0	0	0	4.18395e+06	0
722	B	42	X	CC	33	35	396.95	14228.5	14.2285	1a		1.11461e+09	1.11461e+09	0	0	4.25967e+07	3.54973e+06	0	0	0	0	0	0	7.09945e+06	0	0	1.20691e+08	0	0	0	0	0	0	0	0	0	0	0	0	0	0	0	3.54973e+06	0	0	0	0	0	3.54973e+06
722	B	43	X	1	17	19	401.58	14613.7	14.6137	2		2.36132e+09	2.36132e+09	0	0	7.92388e+06	0	0	7.92388e+06	0	0	0	0	7.92388e+06	0	0	1.14896e+09	0	0	0	0	0	0	0	0	0	4.75433e+07	7.92388e+06	0	0	0	0	4.75433e+07	0	0	0	0	1.58478e+07	7.92388e+06
722	B	43	X	2	109	111	404	14815.1	14.8151	2		3.58914e+09	3.58914e+09	0	0	4.62121e+07	0	0	1.5404e+07	0	0	2.3106e+07	0	6.16161e+07	3.08081e+07	0	2.3106e+09	0	0	0	0	0	0	0	0	0	5.39141e+07	3.08081e+07	0	0	0	0	1.23232e+08	0	0	0	0	3.08081e+07	1.5404e+07
722	B	43	X	3	13	15	404.54	14860	14.86	2		4.97579e+09	4.97579e+09	0	0	3.10018e+07	0	0	1.55009e+07	0	0	0	0	4.65027e+07	0	0	4.02249e+09	0	0	0	0	0	0	0	0	0	3.87523e+07	0	0	0	0	0	2.32514e+07	0	0	7.75046e+06	0	2.32514e+07	1.55009e+07
722	B	43	X	CC	21	23	404.94	14893.3	14.8933	2		2.96451e+09	2.96451e+09	0	0	3.15374e+07	0	0	0	0	0	0	0	1.57687e+07	0	0	2.04204e+09	0	0	0	0	0	0	0	0	0	2.3653e+08	4.7306e+07	0	0	0	0	3.15374e+07	0	0	7.88434e+06	0	0	7.88434e+06
[truncated: 15 more columns]

## Sheet: CaCO3 Corrected
EXP	Site	Hole	Core	Type	Section	Top Offset (cm) – Sampled	Bottom Offset (cm) – Sampled	depth CSF-A (m)	Age (ka)	Age (Ma)	CaCO3 (eq.)	Taphogroup	Interval	Coccoliths (g/CaCO3)	Siliceous Fragments	Braarudosphaera bigelowii	Calcidiscus leptoporus subsp leptoporus	Calcidiscus leptoporus subsp small	Calcidiscus macintyrei	Calcidiscus tropicus	Coccolithus miopelagicus	Coccolithus pelagicus	Coronocyclus baileyi	Coronocyclus nitescens	Cyclicargolithus floridanus	Discoastrids	Helicosphaera spp.	Oolitothus spp.	Pontosphaera spp.	Reticulofenestra medium sized	Reticulofenestra minuta	Reticulofenestra pseudoumbilicus	Rhabdosphaera sp.	Sphenolithus spp.	Syracosphaera sp.	Umbellosphaera sp.	Umbilicosphaera jafari	Umbilicosphaera rotula
117	722	B	30	X	1	101	103	276.62	8745.56	8.74556	82.2497	1b	4	4.99542e+10	3.40126e+07	0	1.24059e+08	2.27441e+08	2.06764e+07	4.13528e+07	0	9.92468e+08	0	0	0	6.20293e+07	2.48117e+08	0	0	1.03382e+08	4.47231e+10	2.06764e+07	0	1.94358e+09	0	0	1.26126e+09	1.86088e+08
117	722	B	30	X	2	6	8	277.17	8784.96	8.78496	50.4998	1b		5.42316e+10	1.02428e+09	0	1.16377e+08	4.98758e+07	4.98758e+07	1.66253e+07	0	1.16377e+09	0	0	0	8.31263e+07	2.16128e+08	0	1.66253e+07	1.99503e+08	4.92274e+10	1.66253e+07	0	9.80891e+08	0	0	1.3134e+09	7.81387e+08
117	722	B	30	X	CC	5	7	277.38	8800	8.8	83.6663	1b		4.19147e+10	1.86896e+08	0	1.31999e+08	2.33536e+08	1.01538e+07	6.09226e+07	0	3.2492e+08	0	0	0	9.13838e+07	1.72614e+08	0	0	3.04613e+08	3.68581e+10	3.04613e+07	0	1.94952e+09	0	0	1.56368e+09	1.82768e+08
117	722	B	31	X	1	141	143	286.72	9131.07	9.13107	42.7498	4a	3b	9.45436e+09	1.29301e+09	0	2.80426e+08	8.01217e+07	0	0	0	1.78271e+09	0	0	0	5.80882e+08	2.00304e+08	0	2.00304e+07	3.80578e+08	4.607e+08	2.16329e+09	0	2.92444e+09	0	0	3.80578e+08	2.00304e+08
117	722	B	31	X	2	52	54	287.33	9152.69	9.15269	53.8331	4b		5.22284e+09	3.76022e+08	0	9.52493e+07	1.58749e+07	0	0	0	4.76247e+08	0	0	0	2.85748e+08	0	0	0	2.22248e+08	1.74624e+08	3.2226e+09	0	7.1437e+08	0	0	0	1.58749e+07
117	722	B	31	X	3	141	143	289.72	9237.41	9.23741	38.2498	4b		1.08577e+10	1.90954e+09	0	6.71608e+07	4.47739e+07	0	0	0	4.02965e+08	0	0	0	4.25352e+08	4.47739e+07	0	0	8.73091e+08	8.0593e+08	6.58176e+09	0	1.47754e+09	0	0	1.34322e+08	0
117	722	B	31	X	4	52	54	290.33	9259.03	9.25903	75.6664	4b		1.00307e+10	2.86574e+08	0	1.72152e+08	1.03291e+08	0	0	0	5.27932e+08	0	0	0	2.18059e+08	1.60675e+08	6.88607e+07	0	4.59071e+08	8.72235e+08	5.16455e+09	0	2.15763e+09	0	0	4.59071e+07	8.03375e+07
117	722	B	31	X	5	102	104	292.33	9329.92	9.32992	39.1665	4b		5.35121e+09	3.06574e+09	0	4.19702e+07	0	0	0	0	2.93792e+08	0	0	0	1.46896e+08	2.09851e+07	0	0	2.93792e+08	4.19702e+07	3.84028e+09	0	5.03643e+08	0	0	1.67881e+08	0
117	722	B	31	X	6	56	58	293.37	9366.78	9.36678	77.1664	4b		1.07228e+10	5.94669e+07	0	9.90814e+07	5.50452e+07	0	0	0	7.70633e+08	0	0	0	3.4128e+08	1.43118e+08	0	0	2.09172e+08	2.86235e+08	5.63663e+09	0	2.9174e+09	0	0	1.98163e+08	6.60543e+07
117	722	B	32	X	1	90	92	295.91	9456.82	9.45682	30.8332	4b		6.35881e+09	1.00903e+09	0	1.06424e+08	2.66059e+07	0	0	0	2.66059e+08	0	0	0	9.04601e+08	0	0	0	1.3303e+08	0	4.76246e+09	0	1.3303e+08	0	0	0	2.66059e+07
117	722	B	32	X	2	50	52	297.01	9495.81	9.49581	70.9164	4b		9.27981e+09	3.94683e+08	0	7.25931e+07	1.33087e+08	0	0	0	9.67907e+08	0	0	0	4.96053e+08	8.46919e+07	0	0	1.81483e+08	1.93581e+08	5.75905e+09	0	1.22198e+09	0	0	1.20988e+08	4.83954e+07
117	722	B	32	X	3	116	118	299.17	9572.37	9.57237	38.1665	4b		1.25142e+10	1.38259e+09	0	6.58642e+07	2.19547e+07	0	4.39095e+07	0	3.95185e+08	0	0	0	1.22947e+09	0	0	0	1.09774e+08	0	1.0187e+10	0	4.1714e+08	0	0	0	4.39095e+07
117	722	B	32	X	4	24	26	299.75	9592.93	9.59293	68.3331	4b		6.5317e+09	3.29395e+08	0	3.61533e+07	2.41022e+07	0	0	0	4.3384e+08	0	0	0	8.55628e+08	0	0	1.20511e+07	9.64088e+07	1.20511e+07	4.77224e+09	0	2.77175e+08	0	0	0	1.20511e+07
117	722	B	32	X	5	7	9	301.08	9640.08	9.64008	25.3332	3	3a	3.4897e+09	4.0634e+09	0	6.40312e+07	0	0	0	0	0	0	0	0	9.60468e+08	0	0	0	0	0	2.43319e+09	0	3.20156e+07	0	0	0	0
117	722	B	32	X	CC	0	2	301.36	9650	9.65	70.4164	4b		6.165e+09	2.40041e+09	0	7.25294e+07	2.41765e+07	0	1.20882e+07	0	1.08794e+08	0	0	0	1.00332e+09	1.20882e+07	0	0	3.14294e+08	0	4.35177e+09	0	1.45059e+08	0	0	7.25294e+07	4.8353e+07
117	722	B	33	X	1	105	107	305.76	9812.53	9.81253	31.5832	3		4.18168e+09	4.26496e+09	0	1.59809e+08	0	0	2.66349e+07	0	7.99047e+07	0	0	0	7.99047e+08	0	0	0	0	0	3.08965e+09	0	0	0	0	0	2.66349e+07
117	722	B	33	X	2	90	92	307.11	9862.4	9.8624	73.4164	4b		1.04287e+10	5.00641e+08	0	7.17192e+08	1.41087e+08	0	2.23388e+08	0	4.82047e+08	0	0	0	8.23008e+08	2.35145e+07	2.35145e+07	0	2.82174e+08	7.05435e+07	6.93678e+09	0	2.5866e+08	0	0	2.93931e+08	1.52844e+08
117	722	B	33	X	3	90	92	308.61	9917.81	9.91781	13.9166	3		6.11589e+09	1.19931e+10	0	6.17767e+07	0	0	0	0	6.17767e+07	0	0	0	5.5599e+08	0	0	0	6.17767e+07	0	5.37457e+09	0	0	0	0	0	0
117	722	B	33	X	CC	30	32	309.51	9951.06	9.95106	71.583	4b		8.45399e+09	7.27314e+08	0	4.55916e+08	1.43288e+08	0	2.60524e+07	0	3.12628e+08	0	0	0	4.81969e+08	5.21047e+07	5.21047e+07	0	1.6934e+08	1.65432e+09	4.59824e+09	0	2.99602e+08	0	0	1.82366e+08	2.60524e+07
117	722	B	34	X	1	130	132	315.61	10176.4	10.1764	29.0832	3		8.51292e+09	7.59707e+09	0	1.16615e+08	2.91539e+07	0	1.45769e+08	0	5.83077e+07	0	0	0	6.12231e+08	0	0	0	5.83077e+07	1.45769e+08	7.34677e+09	0	0	0	0	0	0
117	722	B	34	X	2	51	53	316.32	10202.6	10.2026	57.3331	4b		1.83595e+10	4.21988e+09	0	4.66884e+08	4.11956e+07	2.74638e+07	5.49275e+07	0	2.1971e+08	0	0	0	7.00326e+08	1.09855e+08	2.74638e+07	2.74638e+07	8.23913e+07	7.03072e+09	9.10424e+09	0	9.61232e+07	0	1.37319e+07	2.60906e+08	9.61232e+07
117	722	B	34	X	3	30	32	317.61	10250.3	10.2503	20.6666	3		7.77946e+09	9.32494e+09	0	1.63778e+08	4.09445e+07	0	0	0	2.45667e+08	0	0	0	1.22834e+08	0	0	0	8.1889e+07	4.09445e+07	7.04246e+09	0	0	0	0	0	4.09445e+07
117	722	B	34	X	4	15	17	318.96	10300.1	10.3001	44.4998	4b		1.1955e+10	4.27718e+09	0	4.36894e+08	1.98588e+07	0	1.98588e+07	0	1.19153e+08	0	0	0	2.58165e+08	9.92941e+07	1.98588e+07	0	1.39012e+08	3.376e+08	1.0267e+10	0	3.97176e+07	0	1.98588e+07	1.19153e+08	5.95765e+07
117	722	B	34	X	CC	35	37	319.82	10331.9	10.3319	45.8331	4b		1.47382e+10	2.0105e+09	0	5.6897e+08	1.83539e+07	0	3.67077e+07	0	1.10123e+08	0	0	0	7.89216e+08	1.10123e+08	1.28477e+08	0	1.65185e+08	3.85431e+09	7.80039e+09	1.83539e+07	1.83539e+07	0	0	1.06452e+09	5.50616e+07
117	722	B	35	X	1	9	11	324.1	10490	10.49	65.9164	4b		1.04131e+10	7.88656e+08	0	3.94434e+08	3.94434e+07	0	0	0	8.80902e+08	0	0	0	3.94434e+08	9.20346e+07	5.25912e+07	0	6.17946e+08	7.88868e+08	6.74482e+09	0	2.62956e+08	0	0	9.20346e+07	5.25912e+07
117	722	B	35	X	2	13	15	325.64	10539	10.539	32.0832	4b		7.09169e+09	7.79963e+09	0	2.35517e+08	2.61686e+07	0	2.61686e+07	0	6.54215e+08	0	0	0	1.57012e+08	5.23372e+07	0	0	3.92529e+08	5.23372e+08	4.89353e+09	0	2.61686e+07	0	0	7.85058e+07	2.61686e+07
117	722	B	35	X	3	10	12	327.11	10585.8	10.5858	57.6664	4b		1.00809e+10	6.26176e+08	0	1.1739e+08	1.46738e+07	0	1.46738e+07	0	3.5217e+08	0	0	0	4.40213e+07	2.93475e+07	7.33688e+07	0	3.5217e+08	1.46738e+09	7.39557e+09	0	4.40213e+07	0	0	1.61411e+08	1.46738e+07
117	722	B	35	X	4	140	142	329.91	10674.8	10.6748	20.5833	3		5.50126e+09	3.48247e+09	0	2.07595e+07	0	0	4.15189e+07	0	0	0	0	0	2.07595e+07	0	0	0	3.9443e+08	0	5.02379e+09	0	0	0	0	0	0
117	722	B	35	X	5	82	84	330.83	10704.1	10.7041	63.2497	4b		9.12639e+09	7.61468e+08	0	1.81233e+08	7.76714e+07	5.1781e+07	1.42398e+08	0	2.9774e+08	0	0	0	3.49521e+08	5.1781e+07	1.16507e+08	0	6.73152e+08	7.76714e+07	6.25255e+09	0	4.14248e+08	0	0	4.01302e+08	3.88357e+07
117	722	B	35	X	6	71	73	332.22	10748.3	10.7483	40.0832	4c		7.31672e+09	1.71777e+09	0	1.04525e+08	2.09049e+07	0	1.04525e+08	0	3.76289e+08	0	0	0	2.09049e+08	0	2.09049e+07	0	9.61627e+08	1.2543e+08	5.24714e+09	0	6.27148e+07	0	0	8.36197e+07	0
117	722	B	35	X	7	19	21	333.2	10779.5	10.7795	46.3331	4b		7.21185e+09	1.28849e+09	0	2.78092e+08	0	0	3.70789e+07	1.85395e+07	1.66855e+08	0	0	0	5.37644e+08	3.70789e+07	0	0	6.8596e+08	0	5.28374e+09	0	9.26973e+07	0	0	5.56184e+07	1.85395e+07
117	722	B	35	X	CC	5	7	333.53	10790	10.79	25.9166	4c		3.07217e+09	2.70186e+09	0	1.00727e+08	0	0	0	0	5.03634e+07	0	0	0	1.84666e+08	1.67878e+07	0	0	4.86846e+08	3.35756e+07	2.1992e+09	0	0	0	0	0	0
117	722	B	36	X	1	65	67	334.36	10821	10.821	70.8331	4c		8.73265e+09	3.30011e+08	0	3.34493e+08	7.1677e+07	2.38923e+07	1.07515e+08	0	3.94223e+08	0	0	0	2.26977e+08	7.1677e+07	0	0	1.67246e+09	4.53954e+08	4.56343e+09	0	4.77847e+08	0	0	3.106e+08	2.38923e+07
117	722	B	36	X	2	39	41	335.6	10867.3	10.8673	52.0831	4b		7.15075e+09	1.35123e+08	0	1.45934e+08	0	0	6.48595e+07	0	1.78364e+08	0	0	0	1.13504e+08	1.62149e+07	0	0	4.37801e+08	1.94578e+08	5.93464e+09	0	1.62149e+07	0	0	4.86446e+07	0
117	722	B	36	X	3	102	104	337.73	10946.9	10.9469	75.1664	4b		6.7253e+09	1.89139e+08	0	1.48689e+08	0	0	5.7188e+07	0	4.57504e+08	0	0	0	4.57504e+07	2.28752e+07	0	0	2.63065e+08	2.28752e+07	5.66161e+09	0	4.57504e+07	0	0	0	0
117	722	B	36	X	4	29	31	338.5	10975.7	10.9757	38.1665	4c	2b	4.98749e+09	7.58088e+08	0	9.82219e+07	1.09135e+07	0	5.45677e+07	0	4.58369e+08	0	0	0	2.72839e+08	3.27406e+07	0	0	1.25506e+09	2.18271e+08	2.4992e+09	0	1.09135e+07	0	0	7.63948e+07	0
117	722	B	36	X	CC	32	34	339.42	11010.1	11.0101	19.4999	4c		2.93002e+09	5.29399e+08	0	0	0	2.04896e+07	2.04896e+07	0	1.43428e+08	0	0	0	6.14689e+07	1.02448e+07	0	0	5.942e+08	1.02448e+07	2.05921e+09	0	0	0	0	1.02448e+07	0
117	722	B	37	X	1	101	103	344.42	11196.9	11.1969	84.9997	4c		1.51119e+10	1.77698e+08	0	9.95514e+07	2.98654e+07	0	1.99103e+07	9.95514e+06	8.95962e+08	0	0	0	1.09507e+08	2.19013e+08	3.98205e+07	0	9.65648e+09	4.97757e+07	3.44448e+09	0	4.67891e+08	0	0	2.98654e+07	3.98205e+07
117	722	B	37	X	2	60	62	345.51	11237.6	11.2376	62.4997	4c		8.6702e+09	2.60522e+07	0	2.08418e+08	0	0	4.16837e+07	2.77891e+07	2.63997e+08	0	0	0	5.55782e+07	1.38946e+07	4.16837e+07	0	3.22354e+09	0	4.73804e+09	0	2.77891e+07	0	0	1.38946e+07	1.38946e+07
117	722	B	37	X	3	10	12	346.51	11275	11.275	79.6663	4c		1.21146e+10	2.47047e+07	0	1.96398e+08	3.10102e+07	3.10102e+07	1.13704e+08	1.03367e+07	6.3054e+08	0	0	0	1.03367e+08	1.03367e+07	1.03367e+07	0	7.48378e+09	0	3.27674e+09	0	1.96398e+08	0	0	0	2.06734e+07
117	722	B	37	X	4	90	92	348.81	11360.9	11.3609	53.1665	4c		1.12813e+10	8.07567e+08	0	6.32892e+07	1.58223e+07	0	3.16446e+07	0	1.89868e+08	0	0	0	6.32892e+07	0	0	0	3.70242e+09	1.58223e+07	7.13586e+09	0	3.16446e+07	0	0	3.16446e+07	0
117	722	B	37	X	5	82	84	350.23	11413.9	11.4139	78.583	4c		1.10287e+10	8.68406e+07	0	2.43118e+08	1.21559e+08	2.21016e+07	1.3261e+08	0	2.54169e+08	0	0	0	7.73557e+07	7.73557e+07	0	0	4.86236e+09	2.54169e+08	4.67449e+09	0	1.3261e+08	0	0	1.43661e+08	3.31524e+07
117	722	B	37	X	6	22	24	351.13	11447.6	11.4476	50.3331	4c		7.93271e+09	1.95391e+08	0	1.18147e+08	0	0	6.75124e+07	3.37562e+07	2.36293e+08	0	0	0	8.43905e+07	0	0	0	1.40088e+09	1.18147e+08	5.8567e+09	0	1.68781e+07	0	0	0	0
117	722	B	37	X	7	20	22	352.61	11502.9	11.5029	83.1663	4c		9.03777e+09	5.77548e+07	0	1.98414e+08	3.96828e+07	7.93657e+07	7.93657e+07	0	3.07542e+08	0	0	0	6.9445e+07	2.97621e+07	0	0	3.32344e+09	1.19049e+08	4.61313e+09	0	5.95243e+07	0	0	1.09128e+08	9.92071e+06
117	722	B	38	X	1	102	104	354.13	11559.6	11.5596	68.1664	4c		8.3604e+09	7.9768e+07	0	1.8203e+08	7.80131e+07	0	2.21037e+08	2.60044e+07	3.64061e+08	0	0	0	1.43024e+08	9.10152e+07	0	0	2.22337e+09	9.75163e+08	3.53659e+09	0	7.80131e+07	2.60044e+07	0	3.51059e+08	6.50109e+07
117	722	B	38	X	2	60	62	355.21	11600	11.6	69.5831	4c		5.41734e+09	9.91987e+07	0	1.66322e+08	1.18801e+07	0	5.94007e+07	2.37603e+07	4.03925e+08	0	0	0	3.44524e+08	5.94007e+07	0	0	2.05526e+09	1.54442e+08	2.05526e+09	0	1.18801e+07	0	0	5.94007e+07	1.18801e+07
117	722	B	38	X	3	10	12	356.21	11636.2	11.6362	69.7497	4c		5.08841e+09	1.63675e+08	0	1.48206e+08	0	3.70515e+07	7.41031e+07	0	5.55773e+08	0	0	0	1.85258e+08	1.23505e+07	0	0	1.75377e+09	4.8167e+08	1.81553e+09	0	1.23505e+07	0	0	1.23505e+07	0
117	722	B	38	X	4	90	92	358.51	11723.9	11.7239	69.9997	4c		4.37613e+09	5.00809e+07	0	9.53926e+07	3.57722e+07	1.19241e+07	2.38481e+07	0	6.91596e+08	0	0	0	1.78861e+08	0	0	0	1.47858e+09	2.02709e+08	1.5859e+09	0	5.96204e+07	0	0	1.19241e+07	0
117	722	B	38	X	5	82	84	359.93	11800	11.8	80.1663	4c		4.07562e+09	1.65014e+07	0	7.20438e+07	1.0292e+07	4.11679e+07	1.0292e+07	0	8.64525e+08	0	0	1.0292e+07	1.33796e+08	0	0	0	1.29679e+09	9.26277e+07	1.49233e+09	0	4.11679e+07	0	0	1.0292e+07	0
117	722	B	38	X	6	22	24	360.83	11880	11.88	52.1665	4c		1.50362e+10	0	0	3.73781e+08	1.35921e+08	1.0194e+08	3.39801e+07	5.09702e+07	6.62613e+08	0	0	0	3.22811e+08	1.0194e+08	0	0	6.09943e+09	2.78637e+09	3.33005e+09	0	4.41742e+08	0	0	5.77662e+08	1.69901e+07
117	722	B	38	X	7	20	22	362.31	12011.6	12.0116	61.3331	1a		1.82965e+10	8.41215e+07	0	6.85776e+07	6.85776e+07	1.37155e+07	4.11466e+07	5.48621e+07	3.56604e+08	0	0	0	8.22931e+07	8.22931e+07	0	0	5.5685e+09	9.46371e+09	2.22191e+09	0	8.22931e+07	1.37155e+07	0	1.50871e+08	2.7431e+07
117	722	B	39	X	1	13	15	362.94	12067.6	12.0676	71.333	4c	2a	7.74612e+09	0	0	1.09788e+08	4.87944e+07	0	2.43972e+07	4.87944e+07	4.63547e+08	0	0	0	3.04965e+08	3.65958e+07	0	1.21986e+07	1.82979e+09	1.46383e+09	3.23263e+09	0	1.21986e+08	0	0	1.21986e+07	3.65958e+07
117	722	B	39	X	2	80	82	365.11	12260.4	12.2604	51.7498	4c		4.84948e+09	8.28249e+06	0	4.80146e+07	0	0	4.80146e+07	4.80146e+07	1.92058e+08	0	0	0	1.92058e+08	0	0	0	1.36041e+09	1.12034e+08	2.83286e+09	0	1.60049e+07	0	0	0	0
117	722	B	39	X	CC	20	22	365.58	12302.2	12.3022	38.3332	4c		7.42507e+09	0	0	0	2.17744e+07	0	4.35488e+07	4.35488e+07	4.79037e+08	0	0	2.17744e+07	4.57262e+08	0	0	0	1.35001e+09	1.74195e+08	4.83392e+09	0	0	0	0	0	0
117	722	B	40	X	1	10	12	372.61	12927.1	12.9271	48.0831	4c		8.34096e+09	0	1.71978e+07	1.03187e+08	1.03187e+08	0	8.59892e+07	1.71978e+07	2.4077e+08	0	0	0	5.50331e+08	0	1.71978e+07	0	2.82045e+09	5.15935e+08	3.76633e+09	0	1.71978e+07	0	0	6.87914e+07	1.71978e+07
117	722	B	40	X	2	5	7	374.06	13056	13.056	73.333	4c		6.56518e+09	0	0	1.52406e+08	1.64129e+08	0	4.68941e+07	0	5.15835e+08	0	0	1.17235e+07	5.51006e+08	8.20647e+07	0	0	1.53578e+09	1.25442e+09	2.09851e+09	0	9.37882e+07	0	0	4.68941e+07	1.17235e+07
117	722	B	40	X	3	17	19	375.68	13200	13.2	39.1665	4c		5.8319e+09	0	0	3.79425e+08	1.82686e+08	0	4.21583e+07	0	3.93478e+08	0	1.40528e+07	3.79425e+08	4.07531e+08	2.81056e+07	0	0	8.85325e+08	6.74533e+08	2.27655e+09	0	7.02639e+07	0	0	8.43167e+07	1.40528e+07
117	722	B	40	X	CC	24	26	376.01	13213.2	13.2132	62.9164	4c		3.23425e+09	0	0	1.47011e+08	5.18864e+07	0	3.45909e+07	0	3.28614e+08	0	0	2.76727e+08	2.33489e+08	2.59432e+07	8.64773e+06	0	5.18864e+08	6.57227e+08	8.47477e+08	0	9.5125e+07	0	0	8.64773e+06	0
117	722	B	41	X	1	32	34	382.53	13474	13.474	67.1664	1a	1	1.40382e+10	0	0	3.67813e+07	4.90417e+07	0	2.45209e+07	0	1.22604e+08	0	0	7.11105e+08	3.67813e+07	4.90417e+07	0	0	4.18081e+09	8.25127e+09	1.96167e+08	0	3.18771e+08	0	2.45209e+07	0	3.67813e+07
117	722	B	41	X	2	22	24	383.93	13530	13.53	91.4996	1a		4.21946e+09	0	0	1.73998e+07	2.60997e+07	0	8.69991e+06	0	9.56991e+07	0	0	8.78691e+08	1.73998e+07	1.73998e+07	1.73998e+07	0	6.17694e+08	2.08798e+09	1.21799e+08	0	2.95797e+08	0	1.73998e+07	0	0
117	722	B	41	X	CC	12	14	384.25	13541	13.541	65.0831	1a		6.33848e+09	0	0	0	5.32646e+07	0	0	0	4.66065e+08	0	0	6.52491e+08	9.3213e+07	1.33161e+07	0	0	1.22508e+09	3.44888e+09	1.06529e+08	0	2.39691e+08	0	0	2.66323e+07	1.33161e+07
117	722	B	42	X	1	105	107	392.86	13888.2	13.8882	83.7497	2		4.12112e+09	0	0	4.02061e+07	4.02061e+07	0	1.00515e+07	0	4.02061e+07	0	0	2.10077e+09	2.0103e+07	1.00515e+07	0	0	3.92009e+08	5.9304e+08	5.62885e+08	0	2.81443e+08	1.00515e+07	0	0	2.0103e+07
117	722	B	42	X	2	105	107	394.36	14013	14.013	81.1663	4a		5.17748e+09	0	0	2.56898e+08	8.89262e+07	0	4.94035e+07	0	9.88069e+06	0	0	1.23509e+09	2.37137e+08	9.88069e+06	4.94035e+07	0	3.75466e+08	7.1141e+08	1.47222e+09	0	6.32364e+08	0	0	1.97614e+07	2.96421e+07
117	722	B	42	X	3	0	2	394.81	14050.4	14.0504	76.6664	4a		5.035e+09	0	0	1.23352e+08	4.48552e+07	0	1.79421e+08	0	5.60691e+07	0	0	6.72829e+07	6.1676e+08	0	0	0	7.0647e+08	8.5225e+08	1.56993e+09	0	7.84967e+08	0	0	2.24276e+07	1.12138e+07
117	722	B	42	X	3	13	15	394.94	14061.3	14.0613	31.4165	4a		8.74086e+08	2.06472e+06	0	1.31441e+07	0	0	0	0	3.94324e+07	0	0	7.88649e+07	7.22928e+07	0	0	0	2.36595e+08	2.16878e+08	1.64302e+08	0	3.94324e+07	0	0	0	1.31441e+07
117	722	B	42	X	4	7	9	396.38	14181.1	14.1811	88.333	4b		2.00357e+09	0	0	9.47314e+06	0	0	0	4.73657e+06	5.21023e+07	0	0	9.9468e+07	1.37361e+08	4.73657e+06	0	0	1.27887e+08	5.21023e+07	1.33098e+09	0	1.84726e+08	0	0	0	0
117	722	B	42	X	CC	33	35	396.95	14228.5	14.2285	61.9998	1a		1.79777e+09	0	0	6.87046e+07	5.72539e+06	0	0	0	1.14508e+07	0	0	1.94663e+08	5.72539e+06	0	5.72539e+06	0	3.09171e+08	9.6759e+08	1.71762e+07	0	1.71762e+08	0	0	2.29015e+07	1.71762e+07
117	722	B	43	X	1	17	19	401.58	14613.7	14.6137	69.2497	2		3.40986e+09	0	0	1.14425e+07	0	0	1.14425e+07	0	1.14425e+07	0	0	1.65916e+09	1.48752e+08	2.2885e+07	1.14425e+07	0	3.77602e+08	3.20389e+08	6.52221e+08	0	1.71637e+08	0	0	0	1.14425e+07
117	722	B	43	X	2	109	111	404	14815.1	14.8151	73.4997	2		4.8832e+09	0	0	6.28739e+07	0	0	2.0958e+07	0	8.38318e+07	4.19159e+07	0	3.14369e+09	3.14369e+08	4.19159e+07	2.0958e+07	0	5.86823e+08	1.99101e+08	5.23949e+07	0	2.82932e+08	0	0	2.0958e+07	1.0479e+07
117	722	B	43	X	3	13	15	404.54	14860	14.86	46.2498	2		1.07585e+10	0	0	6.70312e+07	0	0	3.35156e+07	0	1.00547e+08	0	0	8.6973e+09	1.34062e+08	6.70312e+07	3.35156e+07	0	5.3625e+08	6.20039e+08	0	0	4.52461e+08	0	0	1.67578e+07	0
117	722	B	43	X	CC	21	23	404.94	14893.3	14.8933	71.7497	2		4.13174e+09	0	0	4.39547e+07	0	0	0	0	2.19773e+07	0	0	2.84607e+09	4.39547e+08	1.09887e+07	1.09887e+07	0	4.06581e+08	2.19773e+07	0	0	3.2966e+08	0	0	0	0

## Sheet: DiversityIndices
EXP	Site	Hole	Core	Type	Section	Top Offset (cm) – Sampled	Bottom Offset (cm) – Sampled	depth CSF-A (m)	Age (ka)	Age (Ma)	Taphogroup	Interval	Taxa_S	Individuals	Dominance_D	Simpson_1-D	Shannon_H	Evenness_e^H/S	Brillouin	Menhinick	Margalef	Equitability_J	Fisher_alpha	Berger-Parker	Chao-1	iChao-1	ACE
117	722	B	30	X	1	101	103	276.62	8745.56	8.74556	1b	4	17	2416	0.8041	0.1959	0.5236	0.0993	0.5091	0.3459	2.054	0.1848	2.468	0.8953	22	27.24	28.2
117	722	B	30	X	2	6	8	277.17	8784.96	8.78496	1b		18	3262	0.8255	0.1745	0.4863	0.09035	0.4747	0.3152	2.101	0.1683	2.51	0.9077	38.99	44.24	31.62
117	722	B	30	X	CC	5	7	277.38	8800	8.8	1b		17	4128	0.777	0.223	0.5831	0.1054	0.5732	0.2646	1.922	0.2058	2.264	0.8794	17.5	19.37	17.92
117	722	B	31	X	1	141	143	286.72	9131.07	9.13107	4a	3b	17	472	0.1904	0.8096	2.019	0.4428	1.935	0.7825	2.599	0.7125	3.451	0.3093	19.99	20.74	19.3
117	722	B	31	X	2	52	54	287.33	9152.69	9.15269	4b		14	329	0.4097	0.5903	1.414	0.2936	1.327	0.7718	2.243	0.5356	2.968	0.617	19.98	22.95	19.03
117	722	B	31	X	3	141	143	289.72	9237.41	9.23741	4b		15	485	0.3957	0.6043	1.471	0.2904	1.404	0.6811	2.264	0.5433	2.933	0.6062	15.33	16.18	16.27
117	722	B	31	X	4	52	54	290.33	9259.03	9.25903	4b		18	874	0.323	0.677	1.614	0.279	1.565	0.6089	2.51	0.5583	3.208	0.5149	19.5	22.49	20.21
117	722	B	31	X	5	102	104	292.33	9329.92	9.32992	4b		12	255	0.5283	0.4717	1.165	0.2671	1.073	0.7515	1.985	0.4688	2.614	0.7176	12.25	12.66	13.63
117	722	B	31	X	6	56	58	293.37	9366.78	9.36678	4b		18	974	0.3567	0.6433	1.469	0.2413	1.426	0.5768	2.47	0.5082	3.135	0.5257	18.33	19.25	19.06
117	722	B	32	X	1	90	92	295.91	9456.82	9.45682	4b		11	239	0.5693	0.4307	1.084	0.2689	0.9952	0.7115	1.826	0.4522	2.382	0.749	13.99	13.99	13.04
117	722	B	32	X	2	50	52	297.01	9495.81	9.49581	4b		16	767	0.415	0.585	1.419	0.2583	1.37	0.5777	2.258	0.5118	2.859	0.6206	17	17	16.81
117	722	B	32	X	3	116	118	299.17	9572.37	9.57237	4b		13	570	0.6688	0.3312	0.8461	0.1793	0.8	0.5445	1.891	0.3299	2.369	0.814	13.25	13.67	13.94
117	722	B	32	X	4	24	26	299.75	9592.93	9.59293	4b		16	542	0.5447	0.4553	1.155	0.1983	1.094	0.6873	2.383	0.4164	3.094	0.7306	20.99	29.07	22.28
117	722	B	32	X	5	7	9	301.08	9640.08	9.64008	3	3a	7	109	0.5195	0.4805	0.9919	0.3852	0.8859	0.6705	1.279	0.5097	1.669	0.6972	8.486	11.46	14.42
117	722	B	32	X	CC	0	2	301.36	9650	9.65	4b		16	510	0.517	0.483	1.197	0.207	1.133	0.7085	2.406	0.4319	3.139	0.7059	20.99	28.48	21.52
117	722	B	33	X	1	105	107	305.76	9812.53	9.81253	3		9	157	0.5599	0.4401	1.03	0.3112	0.9276	0.7183	1.582	0.4687	2.074	0.7389	11.98	13.45	12.51
117	722	B	33	X	2	90	92	307.11	9862.4	9.8624	4b		21	887	0.4531	0.5469	1.5	0.2134	1.444	0.7051	2.946	0.4926	3.859	0.6652	24	28.99	24.63
117	722	B	33	X	3	90	92	308.61	9917.81	9.91781	3		7	99	0.7739	0.2261	0.5863	0.2568	0.4835	0.7035	1.306	0.3013	1.72	0.8788	12.94	13.91	14.64
117	722	B	33	X	CC	30	32	309.51	9951.06	9.95106	4b		21	649	0.3404	0.6596	1.668	0.2524	1.595	0.8243	3.089	0.5477	4.152	0.5439	21.25	21.83	22.18
117	722	B	34	X	1	130	132	315.61	10176.4	10.1764	3		10	292	0.7487	0.2513	0.6519	0.1919	0.5912	0.5852	1.585	0.2831	2.005	0.863	11.49	15.1	11.97
117	722	B	34	X	2	51	53	316.32	10202.6	10.2026	4b		23	1337	0.3938	0.6062	1.282	0.1567	1.245	0.629	3.056	0.409	3.946	0.4959	23.5	24.08	24.49
117	722	B	34	X	3	30	32	317.61	10250.3	10.2503	3		9	190	0.8203	0.1797	0.5079	0.1846	0.4341	0.6529	1.525	0.2311	1.964	0.9053	10.99	12.98	14.09
117	722	B	34	X	4	15	17	318.96	10300.1	10.3001	4b		15	602	0.7401	0.2599	0.7261	0.1378	0.6775	0.6114	2.187	0.2681	2.788	0.8588	18	24.48	17.68
117	722	B	34	X	CC	35	37	319.82	10331.9	10.3319	4b		21	803	0.3558	0.6442	1.477	0.2085	1.421	0.7411	2.99	0.485	3.947	0.5293	24.33	28.24	23.59
117	722	B	35	X	1	9	11	324.1	10490	10.49	4b		19	792	0.4367	0.5633	1.447	0.2237	1.393	0.6751	2.697	0.4914	3.502	0.6477	20.5	24.5	20.8
117	722	B	35	X	2	13	15	325.64	10539	10.539	4b		15	271	0.4919	0.5081	1.267	0.2368	1.164	0.9112	2.499	0.468	3.421	0.69	22.47	35.41	25.66
117	722	B	35	X	3	10	12	327.11	10585.8	10.5858	4b		17	687	0.5612	0.4388	1.03	0.1648	0.9812	0.6486	2.449	0.3635	3.155	0.7336	21.99	27.98	25.69
117	722	B	35	X	4	140	142	329.91	10674.8	10.6748	3		6	265	0.8363	0.1637	0.405	0.2499	0.368	0.3686	0.8961	0.226	1.092	0.9132	6.498	7.992	8.944
117	722	B	35	X	5	82	84	330.83	10704.1	10.7041	4b		20	705	0.4795	0.5205	1.43	0.209	1.364	0.7532	2.897	0.4775	3.831	0.6851	20	20	20
117	722	B	35	X	6	71	73	332.22	10748.3	10.7483	4c		16	350	0.5281	0.4719	1.211	0.2097	1.121	0.8552	2.561	0.4366	3.458	0.7171	16.75	17.5	18.01
117	722	B	35	X	7	19	21	333.2	10779.5	10.7795	4b		14	389	0.5457	0.4543	1.171	0.2305	1.098	0.7098	2.18	0.4439	2.842	0.7326	15	16.74	16.86
117	722	B	35	X	CC	5	7	333.53	10790	10.79	4c		10	183	0.5272	0.4728	1.14	0.3127	1.036	0.7392	1.728	0.4951	2.272	0.7158	10	10.25	10.5
117	722	B	36	X	1	65	67	334.36	10821	10.821	4c		15	731	0.3117	0.6883	1.713	0.3696	1.661	0.5548	2.123	0.6325	2.671	0.5226	15	15	15
117	722	B	36	X	2	39	41	335.6	10867.3	10.8673	4b		12	441	0.6932	0.3068	0.8086	0.1871	0.7544	0.5714	1.807	0.3254	2.276	0.8299	12.5	14.49	13.36
117	722	B	36	X	3	102	104	337.73	10946.9	10.9469	4b		11	588	0.7143	0.2857	0.7244	0.1876	0.6858	0.4536	1.568	0.3021	1.921	0.8418	11	11	11
117	722	B	36	X	4	29	31	338.5	10975.7	10.9757	4c	2b	13	457	0.3046	0.6954	1.639	0.3962	1.573	0.6081	1.959	0.6391	2.492	0.5011	14	14.49	14.37
117	722	B	36	X	CC	32	34	339.42	11010.1	11.0101	4c		11	286	0.5156	0.4844	1.1	0.2732	1.027	0.6504	1.768	0.4588	2.271	0.7028	11.75	12.49	13.3
117	722	B	37	X	1	101	103	344.42	11196.9	11.1969	4c		18	1518	0.4202	0.5798	1.272	0.1981	1.244	0.462	2.321	0.4399	2.869	0.6021	19.5	23.34	19.91
117	722	B	37	X	2	60	62	345.51	11237.6	11.2376	4c		15	624	0.3943	0.6057	1.246	0.2318	1.199	0.6005	2.175	0.4602	2.766	0.5465	17.5	20.16	19.17
117	722	B	37	X	3	10	12	346.51	11275	11.275	4c		17	1172	0.3667	0.6333	1.348	0.2263	1.316	0.4966	2.264	0.4756	2.818	0.5324	22	32.11	21.77
117	722	B	37	X	4	90	92	348.81	11360.9	11.3609	4c		12	713	0.463	0.537	1.059	0.2402	1.025	0.4494	1.674	0.4261	2.05	0.6325	12.75	13.87	13.85
117	722	B	37	X	5	82	84	350.23	11413.9	11.4139	4c		17	998	0.3501	0.6499	1.424	0.2444	1.384	0.5381	2.317	0.5026	2.911	0.4238	17.33	18	18.55
117	722	B	37	X	6	22	24	351.13	11447.6	11.4476	4c		12	470	0.5654	0.4346	1.006	0.2278	0.954	0.5535	1.788	0.4048	2.243	0.7383	12.25	12.67	13.45
117	722	B	37	X	7	20	22	352.61	11502.9	11.5029	4c		16	911	0.367	0.633	1.381	0.2487	1.34	0.5301	2.201	0.4981	2.757	0.5104	17	18.49	17
117	722	B	38	X	1	102	104	354.13	11559.6	11.5596	4c		18	643	0.24	0.76	1.882	0.3648	1.816	0.7099	2.629	0.6511	3.437	0.423	18	18.12	18.37
117	722	B	38	X	2	60	62	355.21	11600	11.6	4c		18	456	0.2623	0.7377	1.768	0.3255	1.684	0.8429	2.777	0.6117	3.741	0.3794	22.99	30.47	22.17
117	722	B	38	X	3	10	12	356.21	11636.2	11.6362	4c		15	412	0.2472	0.7528	1.723	0.3735	1.646	0.739	2.325	0.6363	3.054	0.3568	17	19.74	21.06
117	722	B	38	X	4	90	92	358.51	11723.9	11.7239	4c		14	367	0.241	0.759	1.752	0.4119	1.669	0.7308	2.201	0.6639	2.884	0.3624	14.5	16.37	14.91
117	722	B	38	X	5	82	84	359.93	11800	11.8	4c		15	396	0.2487	0.7513	1.689	0.3609	1.609	0.7538	2.341	0.6236	3.085	0.3662	17.99	22.98	18.15
117	722	B	38	X	6	22	24	360.83	11880	11.88	4c		20	885	0.1958	0.8042	1.96	0.3551	1.907	0.6723	2.8	0.6544	3.637	0.3164	23	29.49	22.68
117	722	B	38	X	7	20	22	362.31	12011.6	12.0116	1a		18	1334	0.3504	0.6496	1.385	0.222	1.355	0.4928	2.362	0.4793	2.942	0.5172	19	20.75	19.4
117	722	B	39	X	1	13	15	362.94	12067.6	12.0676	4c	2a	20	635	0.2488	0.7512	1.798	0.3017	1.729	0.7937	2.944	0.6	3.928	0.4173	20.75	21.78	22.16
117	722	B	39	X	2	80	82	365.11	12260.4	12.2604	4c		13	303	0.4061	0.5939	1.329	0.2904	1.243	0.7468	2.1	0.518	2.762	0.5842	15.99	18.22	14.98
117	722	B	39	X	CC	20	22	365.58	12302.2	12.3022	4c		15	341	0.4472	0.5528	1.355	0.2583	1.266	0.8123	2.401	0.5002	3.208	0.651	16	17.74	16.93
117	722	B	40	X	1	10	12	372.61	12927.1	12.9271	4c		19	485	0.2995	0.7005	1.653	0.2749	1.572	0.8627	2.911	0.5615	3.941	0.4515	26.48	38.33	24.37
117	722	B	40	X	2	5	7	374.06	13056	13.056	4c		17	560	0.1779	0.8221	2.055	0.4592	1.984	0.7184	2.528	0.7253	3.309	0.3196	22.99	22.99	21.36
117	722	B	40	X	3	17	19	375.68	13200	13.2	4c		16	415	0.1952	0.8048	2.09	0.5054	1.999	0.7854	2.488	0.7539	3.305	0.3904	16.5	18.37	17.38
117	722	B	40	X	CC	24	26	376.01	13213.2	13.2132	4c		16	374	0.1442	0.8558	2.219	0.5751	2.12	0.8273	2.532	0.8005	3.397	0.262	18.99	19.74	19.15
117	722	B	41	X	1	32	34	382.53	13474	13.474	1a	1	14	1145	0.4287	0.5713	1.184	0.2335	1.156	0.4137	1.846	0.4488	2.245	0.5878	14	14	14
117	722	B	41	X	2	22	24	383.93	13530	13.53	1a		17	485	0.3115	0.6885	1.569	0.2824	1.497	0.7719	2.587	0.5537	3.428	0.4948	19.49	22.16	22.19
117	722	B	41	X	CC	12	14	384.25	13541	13.541	1a		14	476	0.3334	0.6666	1.578	0.3462	1.513	0.6417	2.109	0.5981	2.705	0.5441	14.33	15.25	15.33
117	722	B	42	X	1	105	107	392.86	13888.2	13.8882	2		15	410	0.3092	0.6908	1.597	0.3292	1.521	0.7408	2.327	0.5897	3.057	0.5098	17	18.99	17.81
117	722	B	42	X	2	105	107	394.36	14013	14.013	4a		19	524	0.1766	0.8234	2.055	0.4107	1.973	0.83	2.875	0.6978	3.864	0.2844	19.25	19.79	20
117	722	B	42	X	3	0	2	394.81	14050.4	14.0504	4a		16	449	0.1686	0.8314	2.105	0.5132	2.02	0.7551	2.456	0.7594	3.24	0.3118	16	16.5	16.29
117	722	B	42	X	3	13	15	394.94	14061.3	14.0613	4a		11	133	0.1548	0.8452	2.078	0.7262	1.902	0.9538	2.045	0.8666	2.845	0.2481	11	11	11
117	722	B	42	X	4	7	9	396.38	14181.1	14.1811	4b		14	423	0.4564	0.5436	1.369	0.2808	1.298	0.6807	2.15	0.5188	2.783	0.6643	15.5	18.49	16.75
117	722	B	42	X	CC	33	35	396.95	14228.5	14.2285	1a		14	314	0.3352	0.6648	1.55	0.3364	1.459	0.7901	2.261	0.5872	3.005	0.5382	16.99	23.46	18.7
117	722	B	43	X	1	17	19	401.58	14613.7	14.6137	2		15	298	0.2947	0.7053	1.637	0.3428	1.539	0.8689	2.457	0.6047	3.329	0.4866	22.47	34.3	25.17
117	722	B	43	X	2	109	111	404	14815.1	14.8151	2		18	466	0.434	0.566	1.471	0.2419	1.388	0.8338	2.767	0.509	3.72	0.6438	18	18.21	18.29
117	722	B	43	X	3	13	15	404.54	14860	14.86	2		14	642	0.66	0.34	0.8775	0.1718	0.8323	0.5525	2.011	0.3325	2.526	0.8084	14.33	15	14.89
117	722	B	43	X	CC	21	23	404.94	14893.3	14.8933	2		13	376	0.4921	0.5079	1.229	0.2628	1.158	0.6704	2.024	0.479	2.612	0.6888	13.25	13.66	14.11
