# Supplementary material for: Biotic Response of Plankton Communities to Middle to Late Miocene Monsoon Wind and Nutrient Flux Changes in the Oman Margin Upwelling Zone
Source: Copernicus journal article supplement (doi:10.5194/cp-2023-14), 2023-03-30
Supplement: Supplementary file 2 [file SupplementaryData2(foraminifera).xlsx]

## Sheet: RawData
											Planktonic foraminifera per 0.1/g
EXP	Site	Hole	Core	Type	Section	Top Offset (cm) – Sampled	Bottom Offset (cm) – Sampled	depth CSF-A (m)	Age (ka)	Age (Ma)	Dentoglobigerina altispira	Fohsella fohsi	Fohsella peripheroacuta	Fohsella peripheroronda	Globigerina bulloides	Globigerina sp.	Globigerinita glutinata	Globigerinoides obliquus	Globigerinoides ruber	Globigerinoides sp.	Globoquadrina dehiscens	Globorotalia archaeomenardii	Globorotalia menardii	Globorotalia plesiotumida	Globorotalia scitula	Globorotalia sp.	Globorotaloides hexagonus	Globoturborotalita druryi	Globoturborotalita nepenthes	Neogloboquadrina acostaensis	Orbulina universa	Paragloborotalia mayeri	Sphaeroidinellopsis seminulina	Sphaeroidinellopsis sp.	Trilobatus quadrilobatus	Trilobatus sacculifer	Trilobatus trilobus	Plankton indet
117	722	B	30	X	1	101	103	276.62	8745.56	8.74556	36.5	0	0	0	115.3	21.2	61.2	107.1	11.8	16.5	0	0	28.2	0	0	0	35.3	0	14.1	47.1	1.2	0	0	0	0	0	38.8	0
117	722	B	30	X	CC	5	7	277.38	8800	8.8	11.5	0	0	0	43.8	0	13.1	50.8	0.8	0	0	0	2.7	3.1	0	0	3.8	0	4.6	62.3	0	0	0	0	0	0.8	23.5	0
117	722	B	31	X	2	52	54	287.33	9152.69	9.15269	2.9	0	0	0	8	3.7	2.9	3.7	5.1	1.1	0	0	0	0.3	0.3	0	0.3	0	0.9	4.9	0.6	0	0.6	0	0	1.1	2	0
117	722	B	31	X	5	102	104	292.33	9329.92	9.32992	0.5	0	0	0	2.4	0	1	0	0	1	0	0	0	0	0	0	0	0	0	0	0	0	0.5	0	2.9	0	0.5	0
117	722	B	32	X	2	50	52	297.01	9495.81	9.49581	20.9	0	0	0	163.6	0	96.4	27.3	0	27.3	0	0	85.5	0	0	0	0.9	0	0	78.2	0	0	0	0	13.6	5.5	46.4	0
117	722	B	32	X	5	7	9	301.08	9640.08	9.64008	0.4	0	0	0	0.7	0	0.4	0	0	0.5	0.1	0	0.5	0	0.1	0	0	0	0	0	0	0	0.4	0	0	0	0.5	0
117	722	B	33	X	2	90	92	307.11	9862.4	9.8624	15.5	0	0	0	30.9	0	53.6	11.8	0	0	3.6	0	19.1	0	1.8	0	17.3	0	0.9	3.6	0	0	0	0	6.4	0	30	0
117	722	B	33	X	CC	30	32	309.51	9951.06	9.95106	56.9	0	0	0	60	0	135	10.6	0	10.6	15.6	0	58.8	0	2.5	0	10	0	10	13.8	0	0	0	0	40.6	0	60	0
117	722	B	34	X	3	30	32	317.61	10250.3	10.2503	0	0	0	0	0	0	0	0	0	0	0	0	0	0	0	0	0	0	0	0	0	0	0	0	0	0	0	0
117	722	B	34	X	CC	35	37	319.82	10331.9	10.3319	0	0	0	0	1	0	1	2.4	0	1	0	0	0	0	0	0.5	0	0	0	0	0	0	0	0	0.5	0	0	0.5
117	722	B	35	X	3	10	12	327.11	10585.8	10.5858	0.7	0	0	0	6.7	0.7	20.7	8	0	4	0	0	6.7	0	0	0	0	0	0	0	0	0	1.3	0	0.7	0	10.7	0
117	722	B	35	X	6	71	73	332.22	10748.3	10.7483	3.6	0	0	0	13.6	0.8	28.8	7.2	0	0	0	0	0.4	0	0	0	0	0	0	0	0	50.8	0	0	31.2	0	6	0
117	722	B	36	X	1	65	67	334.36	10821	10.821	13.5	0	0	0	0	0	68	129.5	0	0	0	0	64.5	0	0	0	4	24	16	0	0	274.5	4	0	77	4	152	8
117	722	B	36	X	4	29	31	338.5	10975.7	10.9757	0	0	0	0	0	0	0.5	0.5	0	0.5	0	0	0	0	0	0	0	0	0	0	0	0.3	0	0.3	0	0	1.3	0
117	722	B	37	X	2	60	62	345.51	11237.6	11.2376	0.5	0	0	0	1.2	0	0.5	1.3	0	0	0	0	9	0	0	0	0	0	0	0	0	6.7	0	0	1.2	0	0	0
117	722	B	37	X	5	82	84	350.23	11413.9	11.4139	6.9	0	0	0	107.7	0	76.9	0	0	6.5	0	0	9.6	0	0	0	0	0	0	0	0	770.4	0	0	6.2	0	25.8	0
117	722	B	38	X	1	102	104	354.13	11559.6	11.5596	9.5	10	0	0	19.5	0	52.4	0	0	0.5	0	0	11	0	0	0	0	0	1.9	0	0	67.6	2.9	0	1.9	0	16.2	1.9
117	722	B	38	X	5	82	84	359.93	11800	11.8	17	33.5	0	0	112	2.5	160	0	0	34.5	81.5	0	48	0	0	0	0	64	0	0	0	2415.5	0	0	0	0	99	0
117	722	B	39	X	1	13	15	362.94	12067.6	12.0676	1.6	1	0	0	1.8	1.8	0.9	0	0	0	0	0	0.4	0	0	0	0	0	0	0	0	49.3	0	0	1.8	0	3.3	0
117	722	B	39	X	CC	20	22	365.58	12302.2	12.3022	0	0	0	0	0.2	0	0.2	0	0	0.9	0.2	0	0	0	0	0	0	0	0	0	0	1.1	0	0	0	0	0	0
117	722	B	40	X	2	5	7	374.06	13056	13.056	5.2	16	0	0	12.8	20.8	64	0	0	8	0.8	0	0	0	0	0	0	0	0	0	0	306.4	0	0	0	7.2	16.8	0
117	722	B	40	X	CC	24	26	376.01	13213.2	13.2132	2.5	8	0	0	7	0	9	0	0	0.5	0	0	0	0	0	0	0	0	0	0	0	130.5	2	0	0	0	10	0
117	722	B	41	X	1	32	34	382.53	13474	13.474	3.2	0	0	91.4	91.4	0	114.3	0	0	0.4	0	0	0	0	0	0	0	0	0	0	0	2065	0	0	0	0	45.7	0
117	722	B	41	X	CC	12	14	384.25	13541	13.541	63.2	0	16.8	0	33.7	104.2	101.1	0	0	7.4	3.2	0	0	0	0	0	0	0	0	0	0	1469.5	0	0	0	0	71.6	0
117	722	B	42	X	2	105	107	394.36	14013	14.013	0	0	0	0	4	6	6	0	0	24.5	0	2	0	0	0	0	0	0	0	0	0	352	0	0	0	0	8	0
117	722	B	42	X	CC	33	35	396.95	14228.5	14.2285	5.8	0	0	0	6.7	39.2	6.7	0	0	24.6	0	0	0	0	0	0	0	0	0	0	0	504.2	7.1	0	0	0	0	0
117	722	B	43	X	2	109	111	404	14815.1	14.8151	5.2	0	0	0	17.4	3.3	0	0	0	17.2	0	0	0	0	0	0	0	0	0	0	0	532.8	0	0	0	0	4.6	13.9
117	722	B	43	X	3	13	15	404.54	14860	14.86	0	0	0	0.8	0	0	1.3	0	0	0.4	0	0	0	0	0	0	0	0	0	0	0	19.6	0	0	0	0	0	2.1

## Sheet: Percentages
										Habitat (see Table 2 for refrences):	open ocean mixed-layer	open ocean thermocline	open ocean thermocline	open ocean thermocline	upwelling	open ocean mixed-layer	open ocean mixed-layer	open ocean mixed-layer	open ocean mixed-layer	open ocean mixed-layer	open ocean thermocline	open ocean thermocline	open ocean thermocline	open ocean thermocline	open ocean sub-thermocline	open ocean thermocline	upwelling	open ocean mixed-layer	open ocean mixed-layer	open ocean thermocline	open ocean mixed-layer	open ocean thermocline	open ocean thermocline	open ocean thermocline	open ocean mixed-layer	open ocean mixed-layer	open ocean mixed-layer
EXP	Site	Hole	Core	Type	Section	Top Offset (cm) – Sampled	Bottom Offset (cm) – Sampled	depth CSF-A (m)	Age (ka)	Age (Ma)	Dentoglobigerina altispira	Fohsella fohsi	Fohsella peripheroacuta	Fohsella peripheroronda	Globigerina bulloides	Globigerina sp.	Globigerinita glutinata	Globigerinoides obliquus	Globigerinoides ruber	Globigerinoides sp.	Globoquadrina dehiscens	Globorotalia archaeomenardii	Globorotalia menardii	Globorotalia plesiotumida	Globorotalia scitula	Globorotalia sp.	Globorotaloides hexagonus	Globoturborotalita druryi	Globoturborotalita nepenthes	Neogloboquadrina acostaensis	Orbulina universa	Paragloborotalia mayeri	Sphaeroidinellopsis seminulina	Sphaeroidinellopsis sp.	Trilobatus quadrilobatus	Trilobatus sacculifer	Trilobatus trilobus	Plankton indet
117	722	B	30	X	1	101	103	276.62	8745.56	8.74556	5.20833	0	0	0	19.837	0	5.93297	23.0072	0.362319	0	0	0	1.22283	1.40399	0	0	1.72101	0	2.08333	28.2156	0	0	0	0	0	0.362319	10.6431	0
117	722	B	30	X	CC	5	7	277.38	8800	8.8	7.55208	0	0	0	20.8333	9.63542	7.55208	9.63542	13.2812	2.86458	0	0	0	0.78125	0.78125	0	0.78125	0	2.34375	12.7604	1.5625	0	1.5625	0	0	2.86458	5.20833	0
117	722	B	31	X	2	52	54	287.33	9152.69	9.15269	5.68182	0	0	0	27.2727	0	11.3636	0	0	11.3636	0	0	0	0	0	0	0	0	0	0	0	0	5.68182	0	32.9545	0	5.68182	0
117	722	B	31	X	5	102	104	292.33	9329.92	9.32992	3.69519	0	0	0	28.925	0	17.0438	4.82673	0	4.82673	0	0	15.1167	0	0	0	0.159123	0	0	13.826	0	0	0	0	2.40453	0.972419	8.20368	0
117	722	B	32	X	2	50	52	297.01	9495.81	9.49581	11.1111	0	0	0	19.4444	0	11.1111	0	0	13.8889	2.77778	0	13.8889	0	2.77778	0	0	0	0	0	0	0	11.1111	0	0	0	13.8889	0
117	722	B	32	X	5	7	9	301.08	9640.08	9.64008	7.96915	0	0	0	15.8869	0	27.5578	6.06684	0	0	1.8509	0	9.82005	0	0.92545	0	8.8946	0	0.462725	1.8509	0	0	0	0	3.29049	0	15.4242	0
117	722	B	33	X	2	90	92	307.11	9862.4	9.8624	11.7465	0	0	0	12.3865	0	27.8695	2.18827	0	2.18827	3.22048	0	12.1387	0	0.516102	0	2.06441	0	2.06441	2.84889	0	0	0	0	8.3815	0	12.3865	0
117	722	B	33	X	CC	30	32	309.51	9951.06	9.95106	0	0	0	0	0	0	0	0	0	0	0	0	0	0	0	0	0	0	0	0	0	0	0	0	0	0	0	0
117	722	B	34	X	3	30	32	317.61	10250.3	10.2503	0	0	0	0	14.4928	0	14.4928	34.7826	0	14.4928	0	0	0	0	0	7.24638	0	0	0	0	0	0	0	0	7.24638	0	0	7.24638
117	722	B	34	X	CC	35	37	319.82	10331.9	10.3319	1.16279	0	0	0	11.1296	1.16279	34.3854	13.289	0	6.64452	0	0	11.1296	0	0	0	0	0	0	0	0	0	2.15947	0	1.16279	0	17.7741	0
117	722	B	35	X	3	10	12	327.11	10585.8	10.5858	2.52809	0	0	0	9.55056	0.561798	20.2247	5.05618	0	0	0	0	0.280899	0	0	0	0	0	0	0	0	35.6742	0	0	21.9101	0	4.21348	0
117	722	B	35	X	6	71	73	332.22	10748.3	10.7483	1.60906	0	0	0	0	0	8.10489	15.435	0	0	0	0	7.68772	0	0	0	0.476758	2.86055	1.90703	0	0	32.7175	0.476758	0	9.17759	0.476758	18.1168	0.953516
117	722	B	36	X	1	65	67	334.36	10821	10.821	0	0	0	0	0	0	14.7059	14.7059	0	14.7059	0	0	0	0	0	0	0	0	0	0	0	8.82353	0	8.82353	0	0	38.2353	0
117	722	B	36	X	4	29	31	338.5	10975.7	10.9757	2.45098	0	0	0	5.88235	0	2.45098	6.37255	0	0	0	0	44.1176	0	0	0	0	0	0	0	0	32.8431	0	0	5.88235	0	0	0
117	722	B	37	X	2	60	62	345.51	11237.6	11.2376	0.683168	0	0	0	10.6634	0	7.61386	0	0	0.643564	0	0	0.950495	0	0	0	0	0	0	0	0	76.2772	0	0	0.613861	0	2.55446	0
117	722	B	37	X	5	82	84	350.23	11413.9	11.4139	4.86431	5.12033	0	0	9.98464	0	26.8305	0	0	0.256016	0	0	5.63236	0	0	0	0	0	0.972862	0	0	34.6134	1.4849	0	0.972862	0	8.29493	0.972862
117	722	B	38	X	1	102	104	354.13	11559.6	11.5596	0.554197	1.09209	0	0	3.65118	0.0814996	5.21597	0	0	1.12469	2.65689	0	1.56479	0	0	0	0	2.08639	0	0	0	78.7449	0	0	0	0	3.22738	0
117	722	B	38	X	5	82	84	359.93	11800	11.8	2.58481	1.61551	0	0	2.90792	2.90792	1.45396	0	0	0	0	0	0.646204	0	0	0	0	0	0	0	0	79.6446	0	0	2.90792	0	5.33118	0
117	722	B	39	X	1	13	15	362.94	12067.6	12.0676	0	0	0	0	7.69231	0	7.69231	0	0	34.6154	7.69231	0	0	0	0	0	0	0	0	0	0	42.3077	0	0	0	0	0	0
117	722	B	39	X	CC	20	22	365.58	12302.2	12.3022	1.13537	3.49345	0	0	2.79476	4.54148	13.9738	0	0	1.74672	0.174672	0	0	0	0	0	0	0	0	0	0	66.8996	0	0	0	1.57205	3.66812	0
117	722	B	40	X	2	5	7	374.06	13056	13.056	1.47493	4.71976	0	0	4.12979	0	5.30973	0	0	0.294985	0	0	0	0	0	0	0	0	0	0	0	76.9912	1.17994	0	0	0	5.89971	0
117	722	B	40	X	CC	24	26	376.01	13213.2	13.2132	0.132703	0	0	3.79033	3.79033	0	4.73999	0	0	0.0165879	0	0	0	0	0	0	0	0	0	0	0	85.6349	0	0	0	0	1.89516	0
117	722	B	41	X	1	32	34	382.53	13474	13.474	3.37841	0	0.89806	0	1.80146	5.57011	5.40439	0	0	0.395574	0.171059	0	0	0	0	0	0	0	0	0	0	78.5535	0	0	0	0	3.82744	0
117	722	B	41	X	CC	12	14	384.25	13541	13.541	0	0	0	0	0.993789	1.49068	1.49068	0	0	6.08696	0	0.496894	0	0	0	0	0	0	0	0	0	87.4534	0	0	0	0	1.98758	0
117	722	B	42	X	2	105	107	394.36	14013	14.013	0.975938	0	0	0	1.12738	6.596	1.12738	0	0	4.13932	0	0	0	0	0	0	0	0	0	0	0	84.8393	1.19468	0	0	0	0	0
117	722	B	42	X	CC	33	35	396.95	14228.5	14.2285	0.874832	0	0	0	2.92732	0.555182	0	0	0	2.89367	0	0	0	0	0	0	0	0	0	0	0	89.6366	0	0	0	0	0.77389	2.33849
117	722	B	43	X	2	109	111	404	14815.1	14.8151	0	0	0	3.30579	0	0	5.3719	0	0	1.65289	0	0	0	0	0	0	0	0	0	0	0	80.9917	0	0	0	0	0	8.67769
117	722	B	43	X	3	13	15	404.54	14860	14.86
