# Supplementary material for: Biotic Response of Plankton Communities to Middle to Late Miocene Monsoon Wind and Nutrient Flux Changes in the Oman Margin Upwelling Zone
Source: Copernicus journal article supplement (doi:10.5194/cp-2023-14), 2023-03-30
Supplement: Supplementary file 3 [file SupplementaryData3(environmentalparameters).xlsx]

## Sheet: Sheet1
EXP	Site	Hole	Core	Type	Section	Top Offset (cm) – Sampled	Bottom Offset (cm) – Sampled	depth CSF-A (m)	Age (ka)	Age (Ma)	Mn/Al (cps/cps)	Dust flux (Kuhnt et al., 2015)	TOC (%Wt)	CaCO3 (Calcite eq.)
117	722	B	30	X	1	101	103	276.62	8745.56	8.74556	0.903797	1.67521	0.16	82.25
117	722	B	30	X	2	6	8	277.17	8784.96	8.78496	1.17849	2.53956	0.87	50.5
117	722	B	30	X	CC	5	7	277.38	8800	8.8	0.874003	1.71008	0.3	83.67
117	722	B	31	X	1	141	143	286.72	9131.07	9.13107	N/A	N/A	0.93	42.75
117	722	B	31	X	2	52	54	287.33	9152.69	9.15269	1.21348	2.44709	0.53	53.83
117	722	B	31	X	3	141	143	289.72	9237.41	9.23741	1.77511	2.78172	1.61	38.25
117	722	B	31	X	4	52	54	290.33	9259.03	9.25903	0.892088	1.77338	0.27	75.67
117	722	B	31	X	5	102	104	292.33	9329.92	9.32992	1.57727	2.87982	1.69	39.17
117	722	B	31	X	6	56	58	293.37	9366.78	9.36678	1.10201	1.83411	0.23	77.17
117	722	B	32	X	1	90	92	295.91	9456.82	9.45682	1.82594	2.82826	1.6	30.83
117	722	B	32	X	2	50	52	297.01	9495.81	9.49581	0.930173	2.14869	0.35	70.92
117	722	B	32	X	3	116	118	299.17	9572.37	9.57237	1.33238	2.7567	1.23	38.17
117	722	B	32	X	4	24	26	299.75	9592.93	9.59293	0.978173	2.12923	0.27	68.33
117	722	B	32	X	5	7	9	301.08	9640.08	9.64008	3.99181	3.25035	2.34	25.33
117	722	B	32	X	CC	0	2	301.36	9650	9.65	0.987596	2.06245	0.41	70.42
117	722	B	33	X	1	105	107	305.76	9812.53	9.81253	2.13657	2.82167	0.72	31.58
117	722	B	33	X	2	90	92	307.11	9862.4	9.8624	1.05668	2.01301	0.2	73.42
117	722	B	33	X	3	90	92	308.61	9917.81	9.91781	1.84071	3.44387	2.42	13.92
117	722	B	33	X	CC	30	32	309.51	9951.06	9.95106	1.35299	2.01039	0.24	71.58
117	722	B	34	X	1	130	132	315.61	10176.4	10.1764	1.76352	3.11901	1.92	29.08
117	722	B	34	X	2	51	53	316.32	10202.6	10.2026	1.30118	2.61182	0.59	57.33
117	722	B	34	X	3	30	32	317.61	10250.3	10.2503	1.40561	2.93943	2.19	20.67
117	722	B	34	X	4	15	17	318.96	10300.1	10.3001	1.07152	2.47971	0.7	44.5
117	722	B	34	X	CC	35	37	319.82	10331.9	10.3319	1.36544	2.4613	0.75	45.83
117	722	B	35	X	1	9	11	324.1	10490	10.49	1.67836	2.30724	0.14	65.92
117	722	B	35	X	2	13	15	325.64	10539	10.539	1.93648	2.85798	1	32.08
117	722	B	35	X	3	10	12	327.11	10585.8	10.5858	1.67269	2.36334	0.4	57.67
117	722	B	35	X	4	140	142	329.91	10674.8	10.6748	3.93541	3.24253	0.97	20.58
117	722	B	35	X	5	82	84	330.83	10704.1	10.7041	1.54406	2.07859	0.19	63.25
117	722	B	35	X	6	71	73	332.22	10748.3	10.7483	1.90674	2.91045	0.87	40.08
117	722	B	35	X	7	19	21	333.2	10779.5	10.7795	2.00126	2.61575	0.3	46.33
117	722	B	35	X	CC	5	7	333.53	10790	10.79	2.5027	3.05758	1.47	25.92
117	722	B	36	X	1	65	67	334.36	10821	10.821	1.7811	1.93271	0.23	70.83
117	722	B	36	X	2	39	41	335.6	10867.3	10.8673	2.08929	2.52284	0.29	52.08
117	722	B	36	X	3	102	104	337.73	10946.9	10.9469	1.20447	1.78163	0.09	75.17
117	722	B	36	X	4	29	31	338.5	10975.7	10.9757	2.48177	2.69276	0.63	38.17
117	722	B	36	X	CC	32	34	339.42	11010.1	11.0101	3.26693	3.029	1.23	19.5
117	722	B	37	X	1	101	103	344.42	11196.9	11.1969	2.01602	2.25742	0.03	85
117	722	B	37	X	2	60	62	345.51	11237.6	11.2376	1.58265	1.7889	0.21	62.5
117	722	B	37	X	3	10	12	346.51	11275	11.275	2.21249	3.27138	0.06	79.67
117	722	B	37	X	4	90	92	348.81	11360.9	11.3609	1.54791	1.86826	0.66	53.17
117	722	B	37	X	5	82	84	350.23	11413.9	11.4139	2.569	2.54271	0.08	78.58
117	722	B	37	X	6	22	24	351.13	11447.6	11.4476	1.17792	2.0314	0.36	50.33
117	722	B	37	X	7	20	22	352.61	11502.9	11.5029	1.93178	1.67685	0.13	83.17
117	722	B	38	X	1	102	104	354.13	11559.6	11.5596	1.94936	2.23405	0.26	68.17
117	722	B	38	X	2	60	62	355.21	11600	11.6	1.51909	2.28781	0.14	69.58
117	722	B	38	X	3	10	12	356.21	11636.2	11.6362	1.9087	2.24561	0.07	69.75
117	722	B	38	X	4	90	92	358.51	11723.9	11.7239	1.61205	2.19463	0.11	70
117	722	B	38	X	5	82	84	359.93	11800	11.8	1.72719	1.88542	0.05	80.17
117	722	B	38	X	6	22	24	360.83	11880	11.88	1.64466	2.70439	0.23	52.17
117	722	B	38	X	7	20	22	362.31	12011.6	12.0116	1.74092	2.40972	0.25	61.33
117	722	B	39	X	1	13	15	362.94	12067.6	12.0676	1.53205	2.05276	0.1	71.33
117	722	B	39	X	2	80	82	365.11	12260.4	12.2604	1.76785	2.44634	0.21	51.75
117	722	B	39	X	CC	20	22	365.58	12302.2	12.3022	2.63909	2.8168	0.24	38.33
117	722	B	40	X	1	10	12	372.61	12927.1	12.9271	2.09828	2.60475	0.29	48.08
117	722	B	40	X	2	5	7	374.06	13056	13.056	2.20704	2.04725	0.11	73.33
117	722	B	40	X	3	17	19	375.68	13200	13.2	2.55758	2.80991	0.09	39.17
117	722	B	40	X	CC	24	26	376.01	13213.2	13.2132	1.54229	2.40542	0.08	62.92
117	722	B	41	X	1	32	34	382.53	13474	13.474	1.67731	2.36506	0.07	67.17
117	722	B	41	X	2	22	24	383.93	13530	13.53	1.37802	1.61809	0.02	91.5
117	722	B	41	X	CC	12	14	384.25	13541	13.541	2.43812	2.3876	0.05	65.08
117	722	B	42	X	1	105	107	392.86	13888.2	13.8882	1.8067	1.75304	0.05	83.75
117	722	B	42	X	2	105	107	394.36	14013	14.013	1.98348	1.90198	0.02	81.17
117	722	B	42	X	3	0	2	394.81	14050.4	14.0504	2.15977	2.01161	0.03	76.67
117	722	B	42	X	3	13	15	394.94	14061.3	14.0613	2.79525	2.75504	0.02	31.42
117	722	B	42	X	4	7	9	396.38	14181.1	14.1811	1.83378	1.69824	0.01	88.33
117	722	B	42	X	CC	33	35	396.95	14228.5	14.2285	2.78927	2.34743	0.07	62
117	722	B	43	X	1	17	19	401.58	14613.7	14.6137	3.29235	2.15601	0.01	69.25
117	722	B	43	X	2	109	111	404	14815.1	14.8151	4.78392	2.18575	0.12	73.5
117	722	B	43	X	3	13	15	404.54	14860	14.86	5.52273	2.10972	0.14	46.25
117	722	B	43	X	CC	21	23	404.94	14893.3	14.8933	5.45476	2.6744	0.01	71.75
