# Supplementary material for: Biotic Response of Plankton Communities to Middle to Late Miocene Monsoon Wind and Nutrient Flux Changes in the Oman Margin Upwelling Zone
Source: Copernicus journal article supplement (doi:10.5194/cp-2023-14), 2023-03-30
Supplement: Supplementary file 4 [file SupplementaryData4_TaphogroupTaxonContribution.xlsx]

## Sheet: Sheet1
	TG1a					TG1b					TG2					TG3					TG4a					TG4b					TG4c
Taxon	min	max	avg.	med.		min	max	avg.	med.		min	max	avg.	med.		min	max	avg.	med.		min	max	avg.	med.		min	max	avg.	med.		min	max	avg.	med.
Braarudosphaera bigelowii	0	0	0	0		0	0	0	0		0	0	0	0		0	0	0	0		0	0	0	0		0	0	0	0		0	0.21	0.01	0
Calcidiscus leptoporus subsp. leptoporus	0.21	0.31	0.26	0.25		0	3.82	0.97	0.37		0.34	1.29	0.86	0.98		0.38	3.82	1.75	1.6		1.5	4.96	2.97	2.71		0.47	6.88	2.25	1.82		0	6.51	2.13	2.18
Calcidiscus leptoporus subsp. small	0.09	0.56	0.37	0.46		0.32	0.84	0.5	0.37		0	0.98	0.2	0		0	0.53	0.14	0		0	1.72	0.86	0.87		0	1.69	0.45	0.37		0	3.13	0.64	0.29
Calcidiscus macintyrei	0.02	0.09	0.05	0.04		0	0.07	0.01	0		0	0	0	0		0	0	0	0		0	0	0	0		0	0.57	0.03	0		0	1.01	0.2	0
Calcidiscus tropicus	0.03	0.15	0.09	0.08		0	0.22	0.12	0.17		0	0.43	0.26	0.31		0	1.71	0.52	0.32		0	3.56	1.13	0.48		0	2.14	0.35	0.17		0	2.64	0.83	0.85
Coccolithus miopelagicus	0	0	0	0		0	0.3	0.06	0		0	0	0	0		0	0	0	0		0	0	0	0		0	0.26	0.02	0		0	0.99	0.18	0
Coccolithus pelagicus	0.78	2.15	1.64	1.99		0.64	7.35	2.62	1.95		0.34	1.72	0.9	0.93		0	3.16	1.13	0.85		0.19	18.86	6.17	2.81		0.75	10.43	4.65	3.71		1.64	21.21	6.33	5.14
Coronocyclus baileyi	0	0	0	0		0	0	0	0		0	0.86	0.17	0		0	0	0	0		0	0	0	0		0	0	0	0		0	0	0	0
Coronocyclus nitescens	0	0	0	0		0	0	0	0		0	0	0	0		0	0	0	0		0	0	0	0		0	0	0	0		0	0.24	0.01	0
Cyclicargolithus floridanus	0	0	0	0		0	20.82	9.4	10.29		48.66	80.84	62.75	64.38		0	0	0	0		0	23.85	8.55	5.18		0	4.96	0.22	0		0	8.56	0.63	0
Discoastrids	0.12	0.22	0.17	0.15		0.26	1.47	0.58	0.41		0.49	10.64	4.63	4.36		0.38	27.52	10.81	8.14		4.58	12.25	7.81	7.21		0.44	16.27	5.57	3.92		0.56	8.39	3.55	3.28
Helicosphaera spp.	0.4	0.5	0.44	0.41		0	0.45	0.28	0.35		0.24	0.86	0.53	0.62		0	0	0	0		0	2.12	0.58	0.1		0	1.6	0.51	0.41		0	1.45	0.45	0.35
Oolitothus spp.	0	0	0	0		0	0.41	0.15	0		0	0.43	0.27	0.31		0	0	0	0		0	0.95	0.24	0		0	1.28	0.23	0		0	0.48	0.06	0
Pontosphaera spp.	0	0.03	0.01	0		0	0	0	0		0	0	0	0		0	0	0	0		0	0.21	0.05	0		0	0.18	0.01	0		0	0.16	0.01	0
Small Reticulofenestrids (< 3µm)	87.94	90.77	89.41	89.53		49.48	58.78	53.64	53.82		0.53	14.39	6.83	5.76		0	1.71	0.37	0		4.87	24.81	15.09	15.33		0	38.29	6.47	2.67		0	20.32	5.94	2.35
Medium Reticulofenestrids (3-5 µm)	0.21	0.73	0.43	0.37		14.64	30.43	22.28	19.33		4.98	12.02	9.49	9.84		0	7.17	1.65	0.85		4.03	27.07	13.09	10.64		0.45	9.51	3.98	3.91		13.14	63.9	30.05	28.05
Large Reticulofenestrids (> 5 µm)	0.03	0.07	0.05	0.04		0.96	12.14	3.81	1.68		0	19.13	6.77	1.07		69.72	91.32	83.27	87.09		18.8	31.18	25.32	25.66		49.59	85.88	67.48	68.51		22.15	73.83	46.78	42.38
Rhabdosphaera sp.	0	0	0	0		0	0	0	0		0	0	0	0		0	0	0	0		0	0	0	0		0	0.12	0.01	0		0	0	0	0
Sphenolithus spp.	1.81	4.65	3.45	3.89		0.45	9.55	4.61	3.78		4.21	7.98	5.97	5.79		0	0.92	0.15	0		4.51	30.93	15.81	13.9		0.12	27.21	5.95	2.53		0	5.47	1.13	0.86
Syracosphaera sp.	0	0	0	0		0	0.07	0.01	0		0	0.24	0.05	0		0	0	0	0		0	0	0	0		0	0	0	0		0	0.31	0.01	0
Umbellosphaera sp.	0	0	0	0		0	0.41	0.12	0		0	0	0	0		0	0	0	0		0	0	0	0		0	0.17	0.01	0		0	0	0	0
Umbilicosphaera jafari	2.42	3.73	2.89	2.52		0	1.27	0.5	0.42		0	0.43	0.12	0		0	0	0	0		0	4.03	1.21	0.41		0	7.22	1.44	1.11		0	4.2	0.92	0.28
Umbilicosphaera rotula	0.37	1.44	0.75	0.44		0	0.96	0.32	0.21		0	0.49	0.21	0.21		0	0.64	0.19	0		0.22	2.12	1.1	1.04		0	1.47	0.38	0.37		0	0.78	0.14	0.11
